# Supplementary material for: The influence of phospho-tau on dendritic spines of cortical pyramidal neurons in patients with Alzheimer’s disease
Source: Oxford University Press journal article supplement (doi:10.1093/brain/awt088), 2013-05-28
Supplement: awt088_Supplementary_Data.zip [file awt088_Supplementary_Data.zip]

Archive with 14 entries (14 files):
- Supplementary_material.docx
- brain-2012-01458-File015.jpg
- Supplementary_material_Merino-Serrais_et_al.pdf
- brain-2012-01458-File014.jpg
- brain-2012-01458-File021.jpg
- brain-2012-01458-File019.jpg
- Supplementary_Table_1.docx
- brain-2012-01458-File016.jpg
- Supplementary_Table_2.docx
- brain-2012-01458-File022.jpg
- brain-2012-01458-File017.jpg
- brain-2012-01458-File020.jpg
- brain-2012-01458-File018.jpg
- Supplementary_Figure_legends.docx
