# Supplementary material for: The influence of phospho-tau on dendritic spines of cortical pyramidal neurons in patients with Alzheimer’s disease
Source: Oxford University Press journal article supplement (doi:10.1093/brain/awt088), 2013-05-28
Supplement: awt088_Supplementary_Data.zip [file awt088_Supplementary_Data.zip › Supplementary_Figure_legends.docx]

**Supplementary Figure 1**

**A** and **E**, **B** and **F**, **C** and **G**, and **D** and **H**,higher magnification of the sections shown in Figures 1A, 1B, 1C and 1D, respectively. Nissl (**A, E**), Aβ/Nissl (**B, F**), PHF-tauAT8 (**C, G)** and PHF-tauPHF-1 (**D, H**) stained sections from the PHC (A-D) and CA1 (E-H) region. Alv, alveus; DG, dentate gyrus; Hf, hippocampal fissure; IML, inner molecular layer; Lac-mol, stratum lacunosum-moleculare; Mol, molecular layer; OML, outer molecular layer; Or, stratum oriens; Pyr, stratum pyramidale Rad, stratum radiatum; WM, white matter; Scale bar (in **H**): 250 µm in **A**-**H**.

**Supplementary Figure 2**

**A**, **C** and **B**, **D** higher magnification of Figures 1C and 1D, respectively, to illustrate the immunostaining for PHF-tauAT8 and PHF-tauPHF-1 in layer III of the PHC (**A**, **B**) and the pyramidal cell layer of CA1 (**C**, **D**). Scale bar (in **D**): 170 µm in **A-D**.

**Supplementary Figure 3**

Combined intracellular LY injection (green) and PHF-tauAT8 (red) immunohistochemistry showing a higher magnification of the cell bodies of LY-injected pyramidal neurons from **Figures 4B** (A-F; PHF-tauAT8 -) and **4H** (G-L; PHF-tauAT8 + pattern I) and from a PHF-tauAT8 + neuronwithpattern IIa(M-R). **A**, **D**, Stack of 16 confocal sections showing the soma of a LY labelled neuron no immunostained for PHF-tauAT8 after combining the red and green channels (**A**), or showing the red channel alone (**D**). **B, C, E, F**, Single optical sections from the stack shown in **A**. **G, J**, Stack of 22 confocal optical sections showing the soma of the labelled PHF-tauAT8–ir LY neuron with pattern I after combining the red and green channels (**G**), or displaying the red channel alone (**J**). **H, I, K, L**, Single optical sections from the stack shown in **G**. Note the accumulation of PHF-tauAT8-ir aggregates in the initial proximal segment of the apical dendrite (arrow) of the injected cell. **M, P**, Stack of 21 confocal optical sections showing the soma of a labelled PHF-tauAT8–ir LY neuron with pattern IIa after combining the red and green channels (**M**), or displaying the red channel alone (**P**). **N, O, Q, R**, Individual optical sections from the stack shown in **M**. Scale bar (in **R**): 10 µm in **A-R**.

**Supplementary Figure 4**

Method used to identify the dendrites of intracellularly labelled cells in contact with Aβ plaques. **A**, Confocal microscopy image of a LY-injected neuron from layer III of the PHC from patient P9 stained with thioflavin-S to visualize the Aβ plaques. The white arrow shows a dendrite in contact with a plaque (blue). **B**, Higher magnification of **A** in a single optical section to show that the labelled dendrite lies within the periphery (yellow arrows) of the Aβ plaque. Scale bar (in **B**): 20 µm in **A**; and 10 µm in **B**.

**Supplementary Figure 5.** **(A-H)** Combined intracellular LY injection and thioflavin S (green) and PHF-tauAT8 (red) and PHF-tauPHF-1 (pseudocolored in blue) immunohistochemistry showing a LY neuron that was not labeled for PHF-tauAT8 or PHF-tauPHF-1 **(A-C)** and a double-labeled LY neuron for PHF-tauAT8 and PHF-tauPHF-1 **(D-F)** (asterisks). These two neurons are also shown in **Fig. 5 B and G**, respectively. Arrows in A and D indicate some thioflavin Spositive neurons**. G, H** images obtained after combining the channels acquired separately in A-C and D-F, respectively. Neurons that are labeled for both PHF-tauAT8 and PHF-tauPHF-1 are visualized with a purple color. Note that the labeling of neurons for both PHF-tauAT8 and PHF-tauPHF-1 could be due to antibody cross-reactivity (see text for further details). Scale bar (in **H**): 30 μm in **A-F**; 17 μm in **G, H.**

**Supplementary Figure 6**

Comparative morphometric analysis of dendrites from LY-injected PHF-tau+  pyramidal neurons and dendrites from LY-injected PHF-tau- neurons in layer III of the PHC. **A**, Dendrite diameter in function of the distance from soma. **B**, Average diameter per dendrite. **C**, Dendritic spine density (dendritic spines/µm) in function of the distance from the soma. **D**, Average spine density per dendrite. **E**, Dendritic spine length in function of the distance from soma. **F,** Average dendritic spine length per dendrite. **G**, Dendritic spine volume in function of the distance from soma. **H**, Average dendritic spine volume per dendrite. **I**, **J**, Frequency distribution of dendritic spine lengths (**I**) and volumes (**J)**. No significant changes were observed for any of the morphometric parameters analysed in the PHC (two way ANOVA, Bonferroni *post-hoc, P>0.05* - A, C, E, G); *Mann-Whitney* test, *P>0.05* - B, D, F, H); Kolmogorov-Smirnov *P>0.05* - I, J).

**Supplementary Figure 7**

Comparative morphometric analysis of dendrite diameter of LY-injected PHF-tau+pyramidal neurons and dendrites from LY-injected PHF-tau- neurons in the CA1 of patient P9 (**A-B**), patient P13 (**C,D**) and patient P14 (**E,F**). **A**,**C,E**, Dendrite diameter in function of the distance from soma. **B**,**D**,F Average dendritic diameter per dendrite. Significant differences were found for the morphometric parameters shown in B (*Mann-Whitney* test, **P<0.05)* and E (two way ANOVA, Bonferroni *post-hoc,* *, *P* < 0.05).

**Supplementary Figure 8**

Combination of LY intracellular injection (green) and PHF-tauAT8 immunohistochemistry (red) in the CA1. Stacks of 18-21 optical confocal sections showing distal dendrites from three PHF-tauAT8-ir neurons (pattern IIa immunostaining) (**A, D, G**) that contained fibrillar PHF-tauAT8 aggregates (**B, E, H)**. **C, F, I**, Images obtained by combining the red and green channels from the confocal microscope. Note the low density of dendritic spines in the distal segments (see **Supplementary Fig. 9**). Scale bar (in **I**): 4 µm in **A-I**.

**Supplementary Figure 9**

Graph showing the dendritic spine density in the distal segments (10-20 µm) of dendrites containing fibrillar PHF-tauAT8 (Tau+) and in the adjacent segments of the same length (pre-terminal segments lacking PHF-tauAT8:Tau-). *, *P* < 0.05; *Mann-Whitney* test.
