# Supplementary material for: The influence of phospho-tau on dendritic spines of cortical pyramidal neurons in patients with Alzheimer’s disease
Source: Oxford University Press journal article supplement (doi:10.1093/brain/awt088), 2013-05-28
Supplement: awt088_Supplementary_Data.zip [file awt088_Supplementary_Data.zip › Supplementary_material.docx]

**Supplementary material**

**Materials and Methods**

**Intracellular injections**. In general, we followed the method described by Elston and Rosa (1997). The injection apparatus consisted of a fixed stage Olympus BX51W1 microscope equipped with a water immersion long working distance 40x objective, a Leica micromanipulator and a perspex tissue chamber mounted on the stage. Coronal sections (250 m) were cut with a vibratome and the slices were incubated for 10 min in 10–5 M 4,6-diamidino-2-phenylindole (DAPI; Sigma, St. Louis, MO, USA) in 0.1 M phosphate buffer. These DAPI pre-labeled sections were mounted in the injection chamber and the nuclei of cells were visualized UV excitation. This pre-labeling facilitated the impalement of the cell using micropipettes (250–300 MΩ) that were pulled on a Sutter Co. flaming/brown micropipette puller model P-97. Cells were then injected individually with Lucifer Yellow (LY; 8% in 0.1 M Tris buffer, pH 7.4) by hyperpolarizing current in the cytoarchitectonically identified hippocampal formation and the adjacent cortex (including the entorhinal and parahippocampal cortex: **Supplementary Table 1**). LY was applied to each injected cell until the individual dendrites of the cell could be traced to an abrupt end at their distal tips (that fluoresced brightly) and their dendritic spines were readily visible. This fluorescence did not diminish at a distance from the soma, indicating that the dendrites were completely filled. Since intracellular injections of pyramidal cells were made in coronal sections, the part of the dendritic arbor nearer to the surface of the slice from which the cell somata were injected was lost (typically approximately 30 m from the surface).

**Immunohistochemistry**

Single immunohistochemistry

Free-floating sections (4-6 sections per case, 50 m) were pre-treated with 1% H2O2 for 30 min to remove the endogenous peroxidase activity and subsequently, the slices used for anti-human Aβ immunochemistry were incubated with 55% formic acid (Sigma-Aldrich, ACS) in PB at room temperature for 20 minutes. All slices were blocked for 1 h in PB with 0.25% Triton-X and 3% normal horse serum (Vector Laboratories Inc., Burlingame, CA, USA). Single immunochemistry was performed with the following monoclonal antibodies: monoclonal mouse anti-human beta-amyloid antibody (Aβ, clone 6F/3D diluted 1:50; Dako, Glostrup, Denmark); mouse anti-human paired helical filaments (PHF)-tau monoclonal antibody (clone AT8, PHF-tauAT8; 1:2000, MN1020; Thermo Scientific; Waltham, MA, USA); mouse PHF-1 monoclonal antibody (PHF-tauPHF-1; 1:100, kindly supplied by Dr P. Davies: see **Supplementary Figs. 1B-C, 2C-D, G-H**). The PHF-tauAT8 antibody has been shown to detect PHF-tau phosphorylated at both Ser202 and Thr205 (Porzig *et al*., 2007), while PHF-tauPHF-1 recognized tau phosphorylated at Ser396 and Ser404 (Greenberg *et al*., 1992). The sections were incubated overnight at 4°C with the antibodies described above and on the following day, the sections were rinsed and incubated for 2 h with biotinylated horse anti-mouse IgG antibodies (1:200, BA-2000: Vector Laboratories). After incubating for 1 h in an avidin–biotin peroxidase complex (Vectastain ABC Elite PK6100, Vector), the staining was then finally developed with the 3, 3´ diaminobenzidine tetrahydrochloride chromogen (DAB: Sigma-Aldrich, St. Louis, MO, USA). After staining, the sections were dehydrated, cleared with xylene and coverslipped with DPX (Fluka AG, Buchs, Switzerland). Slices immunostained for Aβ were then counterstained by the Nissl technique (**Supplementary Fig. 1**) to visualize the hippocampal strata or to perform quantitative studies (see below).

Combination of LY intracellular injection withimmunohistochemistry and histochemistry

Following intracellular injection of pyramidal neurons with LY, the sections were processed with a rabbit antibody against LY produced at the Cajal Institute [1:400,000 in stock solution containing 2% BSA (A3425, Sigma), 1% Triton X-100 (30632, BDH Chemicals, 5% sucrose in PB] and then with the anti-PHF-tauAT8 or anti-PHF-tauPHF-1. Antibody binding was detected with a biotinylated donkey anti-rabbit secondary antibody (1:200 in stock solution; RPN1004, Amersham Pharmacia Biotech), followed by a mixture of Alexa fluor 594 anti-mouse (1:1000) and streptavidin coupled to Alexa fluor 488 (1:1000; Molecular Probes, Eugene, OR, USA). Thereafter, the sections were washed in PB and treated with Autofluorescence Eliminator Reagent (2160, Chemicon) to reduce lipofuscin-like autofluorescence without adversely affecting any other fluorescent labelling in the sections. The sections were then washed and mounted with ProLong Gold Antifade Reagent (Invitrogen Corporation, Carlsbad, CA, USA). Sections were imaged with a Leica TCS 4D confocal scanning laser attached to a Leitz DMIRB fluorescence microscope. For the experiments to check for the presence of PHF-tauPHF-1 in LY-injected neurons that were non-immunostained for PHF-tauAT8, sections were recovered and reprocessed immunocytochemically using anti-PHF-tauPHF-1 and Alexa fluor 647 anti-mouse (1:1000; Molecular Probes, Eugene, OR, USA).

After the reconstruction and analysis of the injected cells (see below for details), the slices were recovered and stained for 15 minutes with thioflavin-S in PB to visualize the Aβ plaques (**Supplementary Fig.** **4**). The tissue was hydrated in an ethanol series for 5 min at each step (100%, 70%, 50% ethanol and PB), and the sections were again washed in PB and mounted with ProLong Gold Antifade Reagent. Finally, sections containing the selected LY-injected neurons used for quantitative analysis (LY-injected neurons that were immunostained or not for PHF-tauAT8 and whose dendrites were not in contact with plaques) were recovered again and processed with the anti-PHF-tauPHF-1 following the same protocol described above, in order to check for the presence of PHF-tauPHF-1 immunostaining in these injected cells (**Supplementary Fig.** **5**).

**Quantitative analysis**

***Estimation of the density and volume occupied by plaques***

Two major types of Aβ plaques were observed in the hippocampal formation and adjacent cortex (**Fig. 1B and Supplementary Fig. 1B, F**), diffuse and neuritic plaques (including those with and without an amyloid core: see Garcia-Marin *et al*., 2009). Since layer III of the PHC from patient P9 was injected and the pyramidal cell layer of the CA1 from patients P9, P13 and P14, we calculated the volume occupied by Aβ plaques with respect to the total volume of these layers using unbiased stereology. In the PHC from patient P9, the plaque density was 3,347 plaques/mm3 and the Aβ plaques occupied an estimated volume of 11%. In the pyramidal layer of CA1, the estimated density of Aβ plaques per mm3 (DAβ) and the volume they occupied (Vo) varied in the three patients analyzed was: patient P9 - DAβ 423, Vo 9.3%; patient P13 - DAβ 1622, Vo 11.7 %; patient P14 - DAβ 1173, Vo 6.1%. Thus, Aβ plaques occupy a relatively small fraction of layer III in the PHC of patient P9 and of the CA1 pyramidal layer in the three patients. Although we did not perform a quantitative study on the proportion of the different types of Aβ plaques, most Aβ plaques appeared to be of the diffuse type in layer III of the PHC in patient P9, whereas the majority were neuritic in the CA1 of each patient (**Supplementary Fig. 1 B, F**).

Unbiased stereology was used to quantify and measure the Aβ plaques in five serial Aβ/Nissl sections of the parahippocampal cortex (PHC) and the CA1 from patient P9, and 4-5 Aβ sections in the CA1 from patients P13 and P14. Stereo Investigator software (Microbrightfield, Colchester, VT, USA) was used to drive a motorized stage (Prior Scientific, Houston, TX, USA) on a dual optical head microscope (Olympus BX51) and to mark the plaques at 20x (NA, 0.7) under brightfield optics. The software sequentially chose random counting frames to quantify plaque density in the x, y and z axes (number of plaques/mm3; 100x100 µm; n= 270 in the PHC from patient P9, and n=1,764, n= 1,883 and n= 1,799 in the CA1 from patients P9, P13 and P14, respectively), moving the motorized stage automatically within the previously defined zones of the PHC and CA1. To obtain homogeneous estimates of Aβ density, tissue shrinkage was evaluated with Stereo Investigator software at five random points of three different sections, estimating shrinkage along the *z* axis in sections after processing for Aβ/Nissl or Aβ staining. The number of labelled plaques was estimated using the optical fractionator method in the Stereo Investigator software and to estimate the plaque volume, the edges of each amyloid plaque were marked with the *Nucleator* probe (Moller *et al*., 1990). Plaques were only marked if their edges lay within the dissector area and they did not intersect forbidden lines, and if they came into the focus as the optical plane moved through the height of the dissector (10 µm). The guard zone thickness was set to 2-3 µm. This sampling method and the section interval were tested in a pilot experiment to ensure that the estimate of the number of plaques was representative of the total number.

***Estimation of the density of PHF-tau*AT8***-****ir******and******PHF-tauPHF1-ir neurons***

Unbiased stereology was used to quantify the total neuron density (neurons/mm3), and the neuron density (neurons/mm3) of PHF-tauAT8-ir (immunoreactive) andPHF-tauPHF1-ir neurons. We used 4-6 serial sections from the same regions and patients used to estimate the density and volume occupied by the plaques. In addition, the CA3 region was also analyzed in the 3 patients. The Stereo Investigator software (Microbrightfield) was used to drive a motorized stage (Prior Scientific) on a dual optical head microscope (Olympus BX 51) and to mark neurons at 40x (NA, 0.85) under brightfield optics. The software sequentially chose random counting frames to quantify the total neuron density in the x, y and z axes (60x60 µm, n=136 in PHC from patient P9, and n=352, n=294 and n=156 in the CA1 region from patients P9, P13 and P14 respectively; 60x60 µm, n=344, n=228 and n=191 in the CA3 region from P9, P13 and P14 respectively), PHF-tau-AT8–ir neuron density (60x60 µm, n=1,458 in the PHC from patient P9, n=800, n=826 and n=781 in CA1 region from patients P9, P13 and P14 respectively) and PHF-tau-PHF1–ir neuron density (60x60 µm, n=1,198 in the PHC from patient P9, n=647, n=474 and n=641 in the CA1 region from patients P9, P13 and P14 respectively), moving the motorized stage automatically within the previously delimited zones of the PHC, CA1 and CA3. Tissue shrinkage was evaluated as described above after processing the sections for Nissl and anti-PHF-tau staining, and the number of labelled neurons was estimated using the optical fractionator method in Stereo Investigator, applying the conditions described previously where the height of the dissector was: 9-10 µm for the total neuron, 8-10 PHF-tauAT8-ir neuron density, and 7-9 µm for PHF-tauPHF1-ir neuron density. The guard zone thickness was set to 2-3 µm for the total neuron, PHF-tauAT8-ir neuron density and for PHF-tauPHF1-ir neuron density. Again this sampling method and the section interval were tested in a pilot experiment to ensure that the estimate of the number of neurons was representative of the total number.

The total neuron density was estimated by counting nucleoli in 4-6 Nissl stained sections per region (CA1 and CA3). Neurons with more than one nucleolus were rare but in such cases, only one nucleolus was considered. In the case of PHF-tauAT8-ir neurons, we analyzed 6 anti-PHF-tauAT8 Nissl counterstained sections in the PHC and CA1 from patient P9, and 5 anti-PHF-tauAT8 sections in patients P13 and P14 (**Figure 2**). The density of CA3 neurons in patient P9 was 14,350 neurons/mm3, whereas in patients P13 and P14 there were only 8,916 neurons/mm3 and 8,447 neurons/mm3. In the case of PHF-tauPHF1-ir neurons we analyzed 4 anti-PHF-tauPHF1 stained sections per region. In all cases, the density obtained was in reference to the total volume estimated in each region (**Figure 2**).

***Reconstruction and morphometric analysis of pyramidal neurons labelled with LY***

Imaging was performed with the same confocal laser scanning system described above, again recording Alexa 488 and 594 fluorescence through separate channels. We obtained image stacks of 10-100 image planes (voxel size, 0.057 x 0.057 x 0.28 µm and area 58.36 x 58.36 µm) with a 63x oil-immersion lens (NA, 1.40; refraction index 1.45) using a calculated optimal zoom factor of 2.3. For each stack, the laser intensity and detector sensitivity were set so that the fluorescence signal from the dendritic spines occupied the full dynamic range of the detector. Therefore, some pixels were saturated in the dendritic shaft, but no pixels were saturated within the dendritic spines. After acquisition, the stacks containing images of intracellular injections (green) and PHF-tauAT8 staining (red) were opened with three-dimensional image processing software Imaris 7.1 (Bitplane AG, Zurich, Switzerland). The red channel was hidden and the stacks were coded (codes were not broken until the quantitative analysis had been completed). Thereafter, we distinguished two main types of LY-injected neurons: neurons free of PHF-tauAT8 somatic staining and neurons with PHF-tauAT8 somatic staining (PHF-tauAT8-ir neurons). Dendritic parameters were measured by another investigator using the same software but only the green channel to ensure impartiality.

*Dendrite diameter* was calculated in three dimensions every 10 m from the soma to the end of the dendrite. *The density of the dendritic spines* was established as the number of dendritic spines found in segments of 10 µm along the length of the dendrite*. Spine volume* was estimated using a method described in detail elsewhere (Benavides-Piccione *et al.*, 2012). Briefly, 7-10 different intensity threshold surfaces were created for each stack of images, and the solid surface that exactly matched the contour of each dendritic spine was then selected. Each dendrite was rotated in 3D and examined to assure that the solid surface selected for each dendritic spine was appropriate. *The length of dendritic spines* was measured individually, from the point of insertion at the dendritic shaft to the distal tip of the spine while rotating the image in 3D.

**References**

Benavides-Piccione R, Fernaud-Espinosa I, Robles V, Yuste R, DeFelipe J (2012) Age-Based Comparison of Human Dendritic Spine Structure Using Complete Three-Dimensional Reconstructions. Cereb Cortex. 2012 [Epub ahead of print]. doi: 10.1093/cercor/bhs154.

Elston GN, Rosa MG. The occipitoparietal pathway of the macaque monkey: comparison of pyramidal cell morphology in layer III of functionally related cortical visual areas. Cereb Cortex. 1997; 7:432-452.

Porzig R, Singer D, Hoffmann R. Epitope mapping of mAbs AT8 and Tau5 directed against hyperphosphorylated regions of the human tau protein. *Biochem Biophys Res Commun* 2007; 358:644-649.

Garcia-Marin V, Blazquez-Llorca L, Rodriguez JR, Boluda S, Muntane G, Ferrer I et al. Diminished perisomatic GABAergic terminals on cortical neurons adjacent to amyloid plaques. Front. Neuroanat 2009; 3:28.

Greenberg SG, Davies P, Schein JD, Binder LI. Hydrofluoric acid-treated tau PHF proteins display the same biochemical properties as normal tau. *J Biol Chem* 1992; 267:564-569.

Moller A, Strange P, Gundersen HJ. Efficient estimation of cell volume and number using the nucleator and the disector. *J Microsc* 1990; 159:61-71.
