# Supplementary material for: The influence of phospho-tau on dendritic spines of cortical pyramidal neurons in patients with Alzheimer’s disease
Source: Oxford University Press journal article supplement (doi:10.1093/brain/awt088), 2013-05-28
Supplement: awt088_Supplementary_Data.zip [file awt088_Supplementary_Data.zip › Supplementary_Table_1.docx]

| **Patient** | **P9** | | **P11** | **P12** | **P13** | **P14** |
| --- | --- | --- | --- | --- | --- | --- |
| **Age/Gender** | Male/82 | | Male/75 | Female/82 | Male/83 | Female/87 |
| **NF/Aβ pathology Braak stage** | AD V/C | | ADIII/B and AGD | AD V/C and LB | AD VI/C and LB | AD III-IV /0-A |
| **Postmortem delay (h)** | 3 | | 2:30 | 2 | 2:30 | 1:30 |
| **Cause of death** | Bronchopneu-  monia plus heart failure | | Lymphoproli-ferative disorder | Heart failure | Respiratoy failure | Respiratoy infection |
| **Cortical regions and number of LY-injected neurons** | | | | | | |
| **CA1** | | 40 (15) | 19 | 71 | 62 (8) | 48 (8) |
| **CA2** | | - | - | 7 | 15 | - |
| **CA3** | | - | - | 35 | 40 | 47 |
| **GD** | | - | - | - | - | 37 |
| **Subiculum** | | 14 | - | - | - | - |
| **Enthorrinal cortex** | | - | 37 | 67 | - | - |
| **Parahippocampal cortex** | | 96 (11) | - | - | 69 | - |

**Supplementary Table 1.** Summary of the patient data and the LY-injected neurons in each cortical area and patient,. In brackets are indicated the number of neurons used for 3D examination. Aβ, Amyloid-β; AGD, Argyrophilic, grain disease; LB, Lewy bodies; NF, Neurofibrillar.
