# Supplementary material for: The influence of phospho-tau on dendritic spines of cortical pyramidal neurons in patients with Alzheimer’s disease
Source: Oxford University Press journal article supplement (doi:10.1093/brain/awt088), 2013-05-28
Supplement: awt088_Supplementary_Data.zip [file awt088_Supplementary_Data.zip › Supplementary_Table_2.docx]

| ***Patient*** | ***Region*** | ***PHF immunostaining*** | ***Dendrite diameter (µm)*** | ***Spine density (spines/µm)*** | ***Spine length (µm)*** | ***Spine volume (µm3)*** |
| --- | --- | --- | --- | --- | --- | --- |
| **P9** | **PHC** | PHF-tau- | 0.949 ± 0.039 | 1.256 ± 0.105 | 1.442 ± 0.051 | 0.330 ± 0.019 |
| PHF-tau+ | 0.961 ± 0.025 | 1.278 ± 0.125 | 1.499 ± 0.044 | 0.332 ± 0.019 |
| **P** | >0.05 | >0.05 | >0.05 | >0.05 |
| **CA1** | PHF-tau- | 1.197 ± 0.075 | 1.881 ± 0.189 | 1.005 ± 0.036 | 0.307 ± 0.054 |
| PHF-tau+ | 0.954 ± 0.021 | 1.610 ± 0.155 | 0.858 ± 0.026 | 0.223 ± 0.014 |
| **P** | 0.024 | >0.05 | 0.016 | >0.05 |
| **P13** | **CA1** | PHF-tau- | 0.938 ± 0.061 | 2.139 ± 0.177 | 1.173 ± 0.142 | 0.250 ± 0.068 |
| PHF-tau+ | 0.814 ± 0.053 | 1.589 ± 0.095 | 1.164 ± 0.015 | 0.264 ± 0.064 |
| **P** | >0.05 | 0.029 | >0.05 | >0.05 |
| **P14** | **CA1** | PHF-tau- | 0.940 ± 0.073 | 2.674 ± 0.221 | 0.988 ± 0.029 | 0.216 ± 0.023 |
| PHF-tau+ | 0.805 ± 0.091 | 1.772 ± 0.085 | 1.063 ± 0.032 | 0.243 ± 0.026 |
| **P** | >0.05 | 0.009 | >0.05 | >0.05 |

**Supplementary Table 2.** Summary of the statistical analysis of dendrite diameter, spine density, spine length and spine volume, showing the average (mean ± SEM) and P value in each cortical area (parahippocampal cortex –PHC and CA1) and AD patient (P9, P13 and P14), indicating the values of PHF-tau- and PHF-tau+ neurons. PHF-tau-; neurons no immunostained for PHF-tauAT8 and PHF-tauPHF-1. PHF-tau+; neurons immunostained for PHF-tauAT8 or PHF-tauPHF-1.
