# Supplementary figures and images for: The influence of phospho-tau on dendritic spines of cortical pyramidal neurons in patients with Alzheimer’s disease
Source: Oxford University Press journal article supplement (doi:10.1093/brain/awt088), 2013-05-28

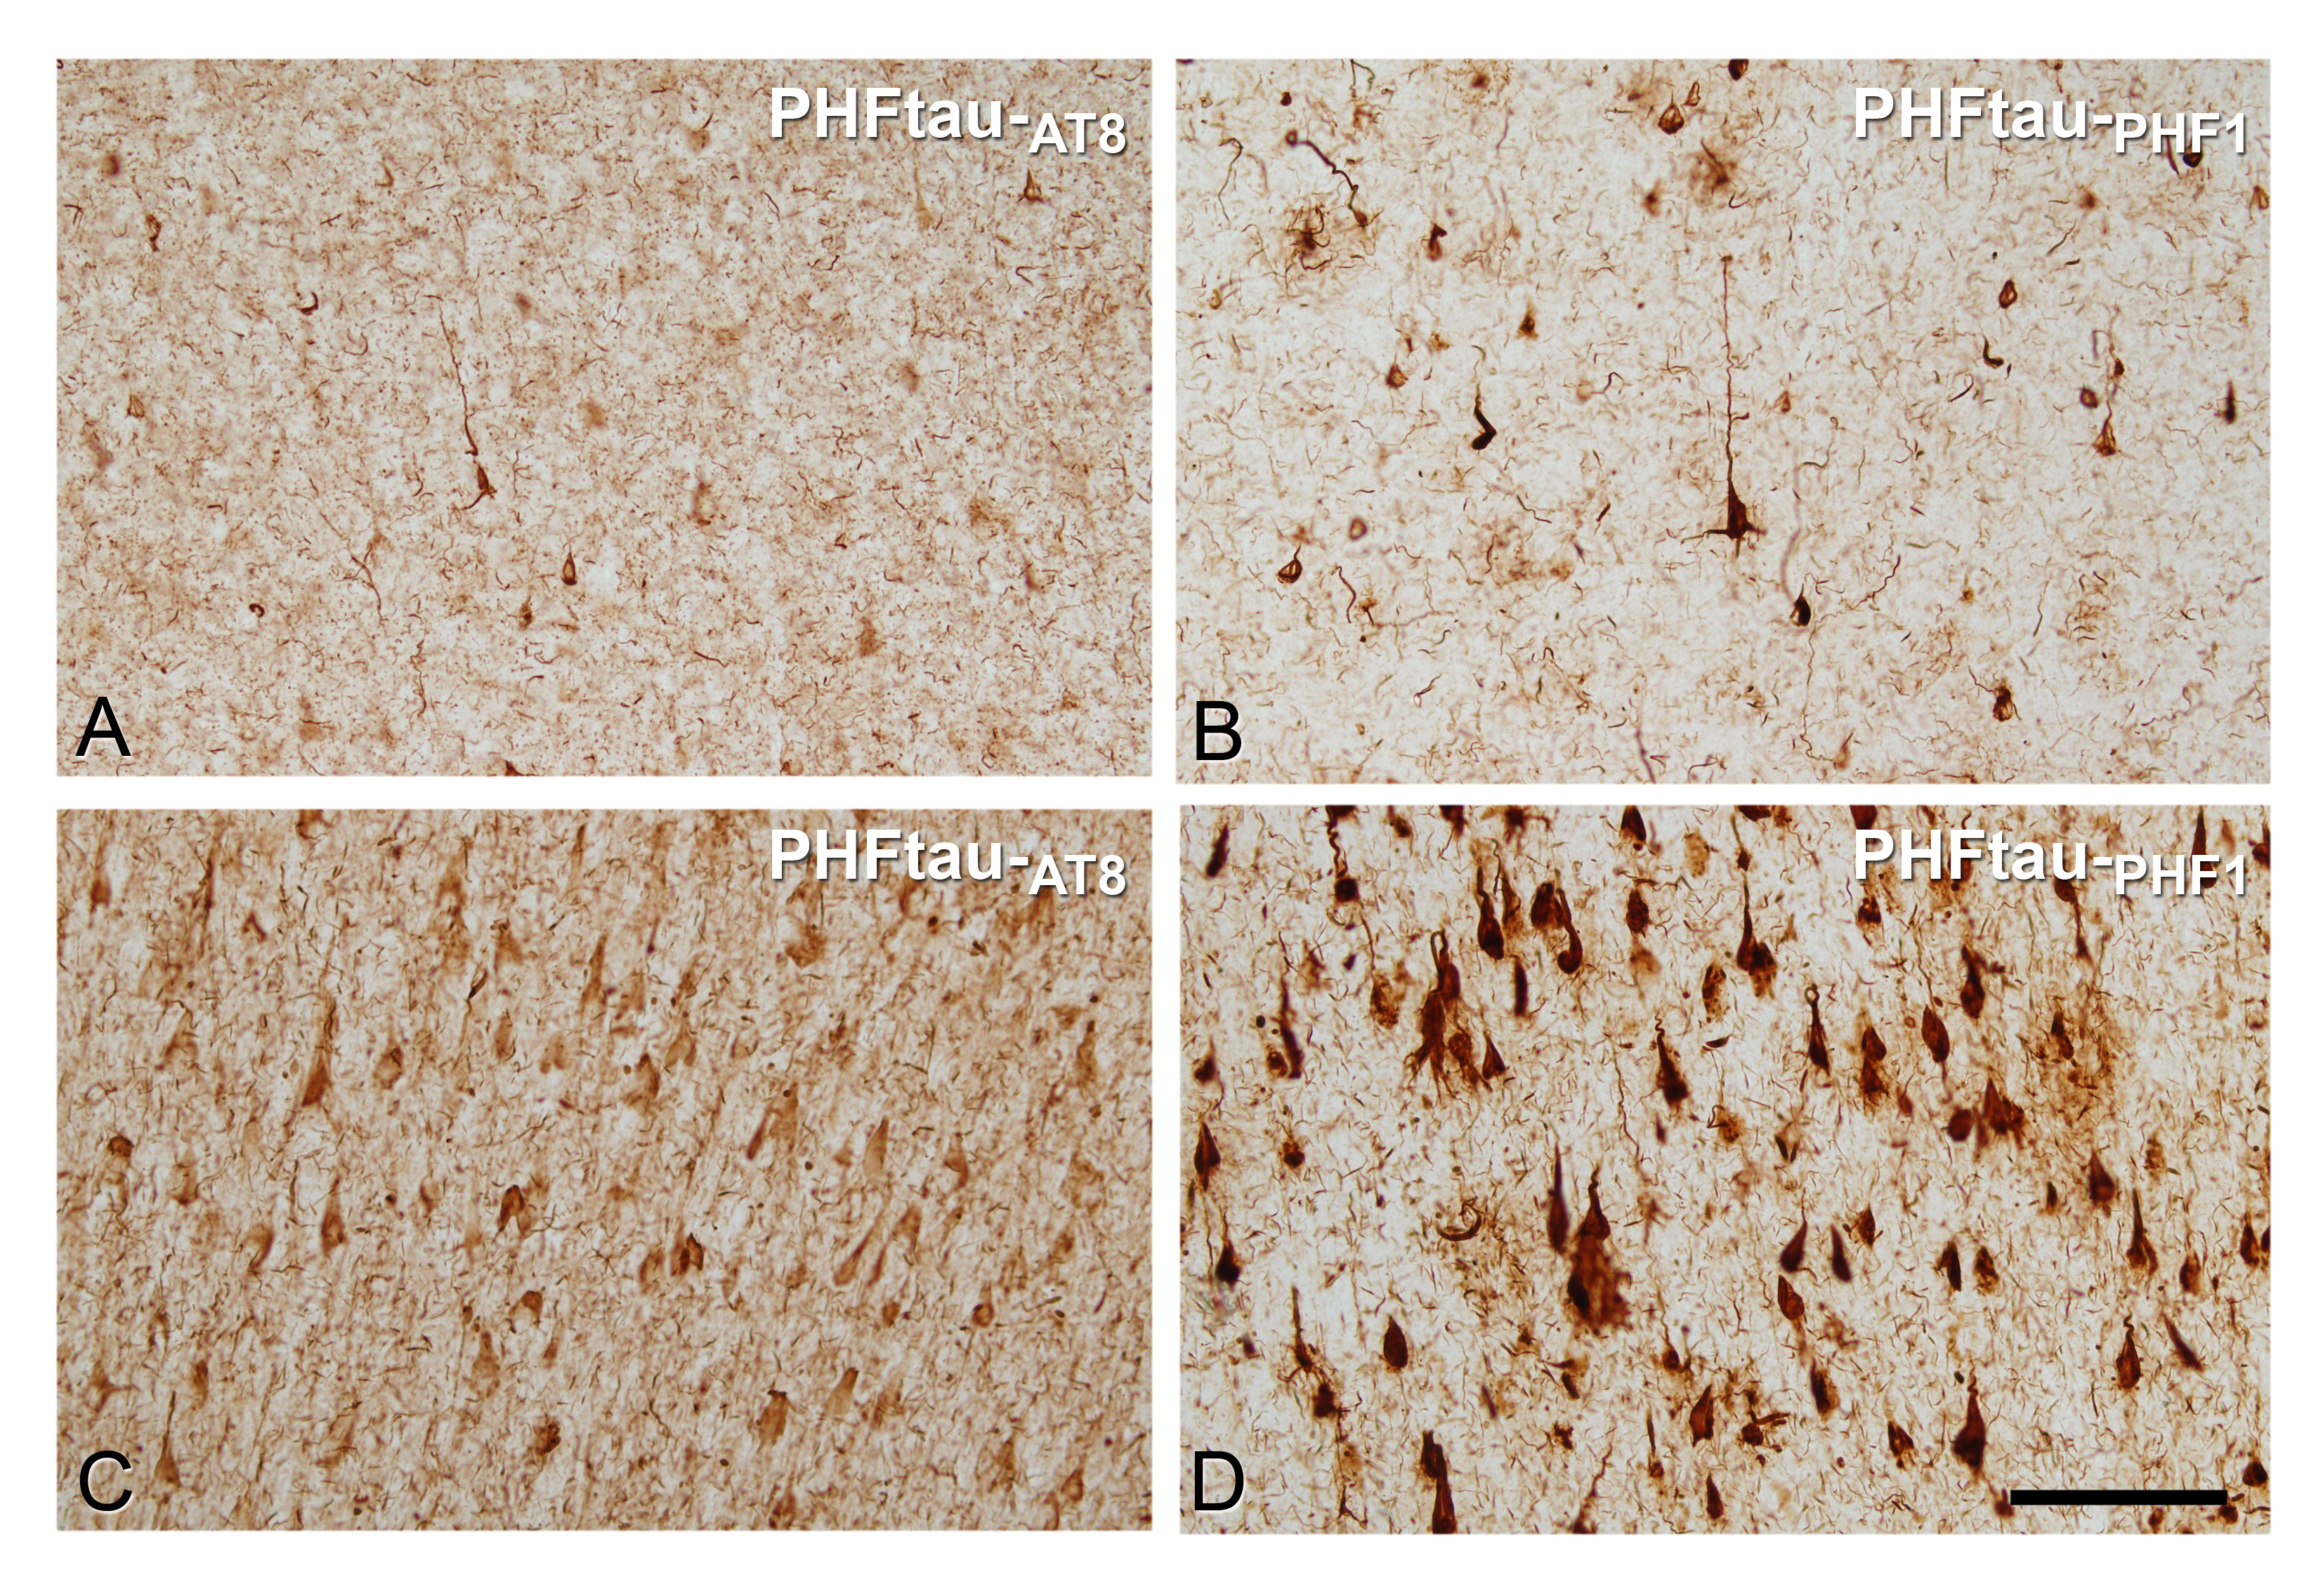

Supplement: awt088_Supplementary_Data.zip [file awt088_Supplementary_Data.zip › brain-2012-01458-File015.jpg]

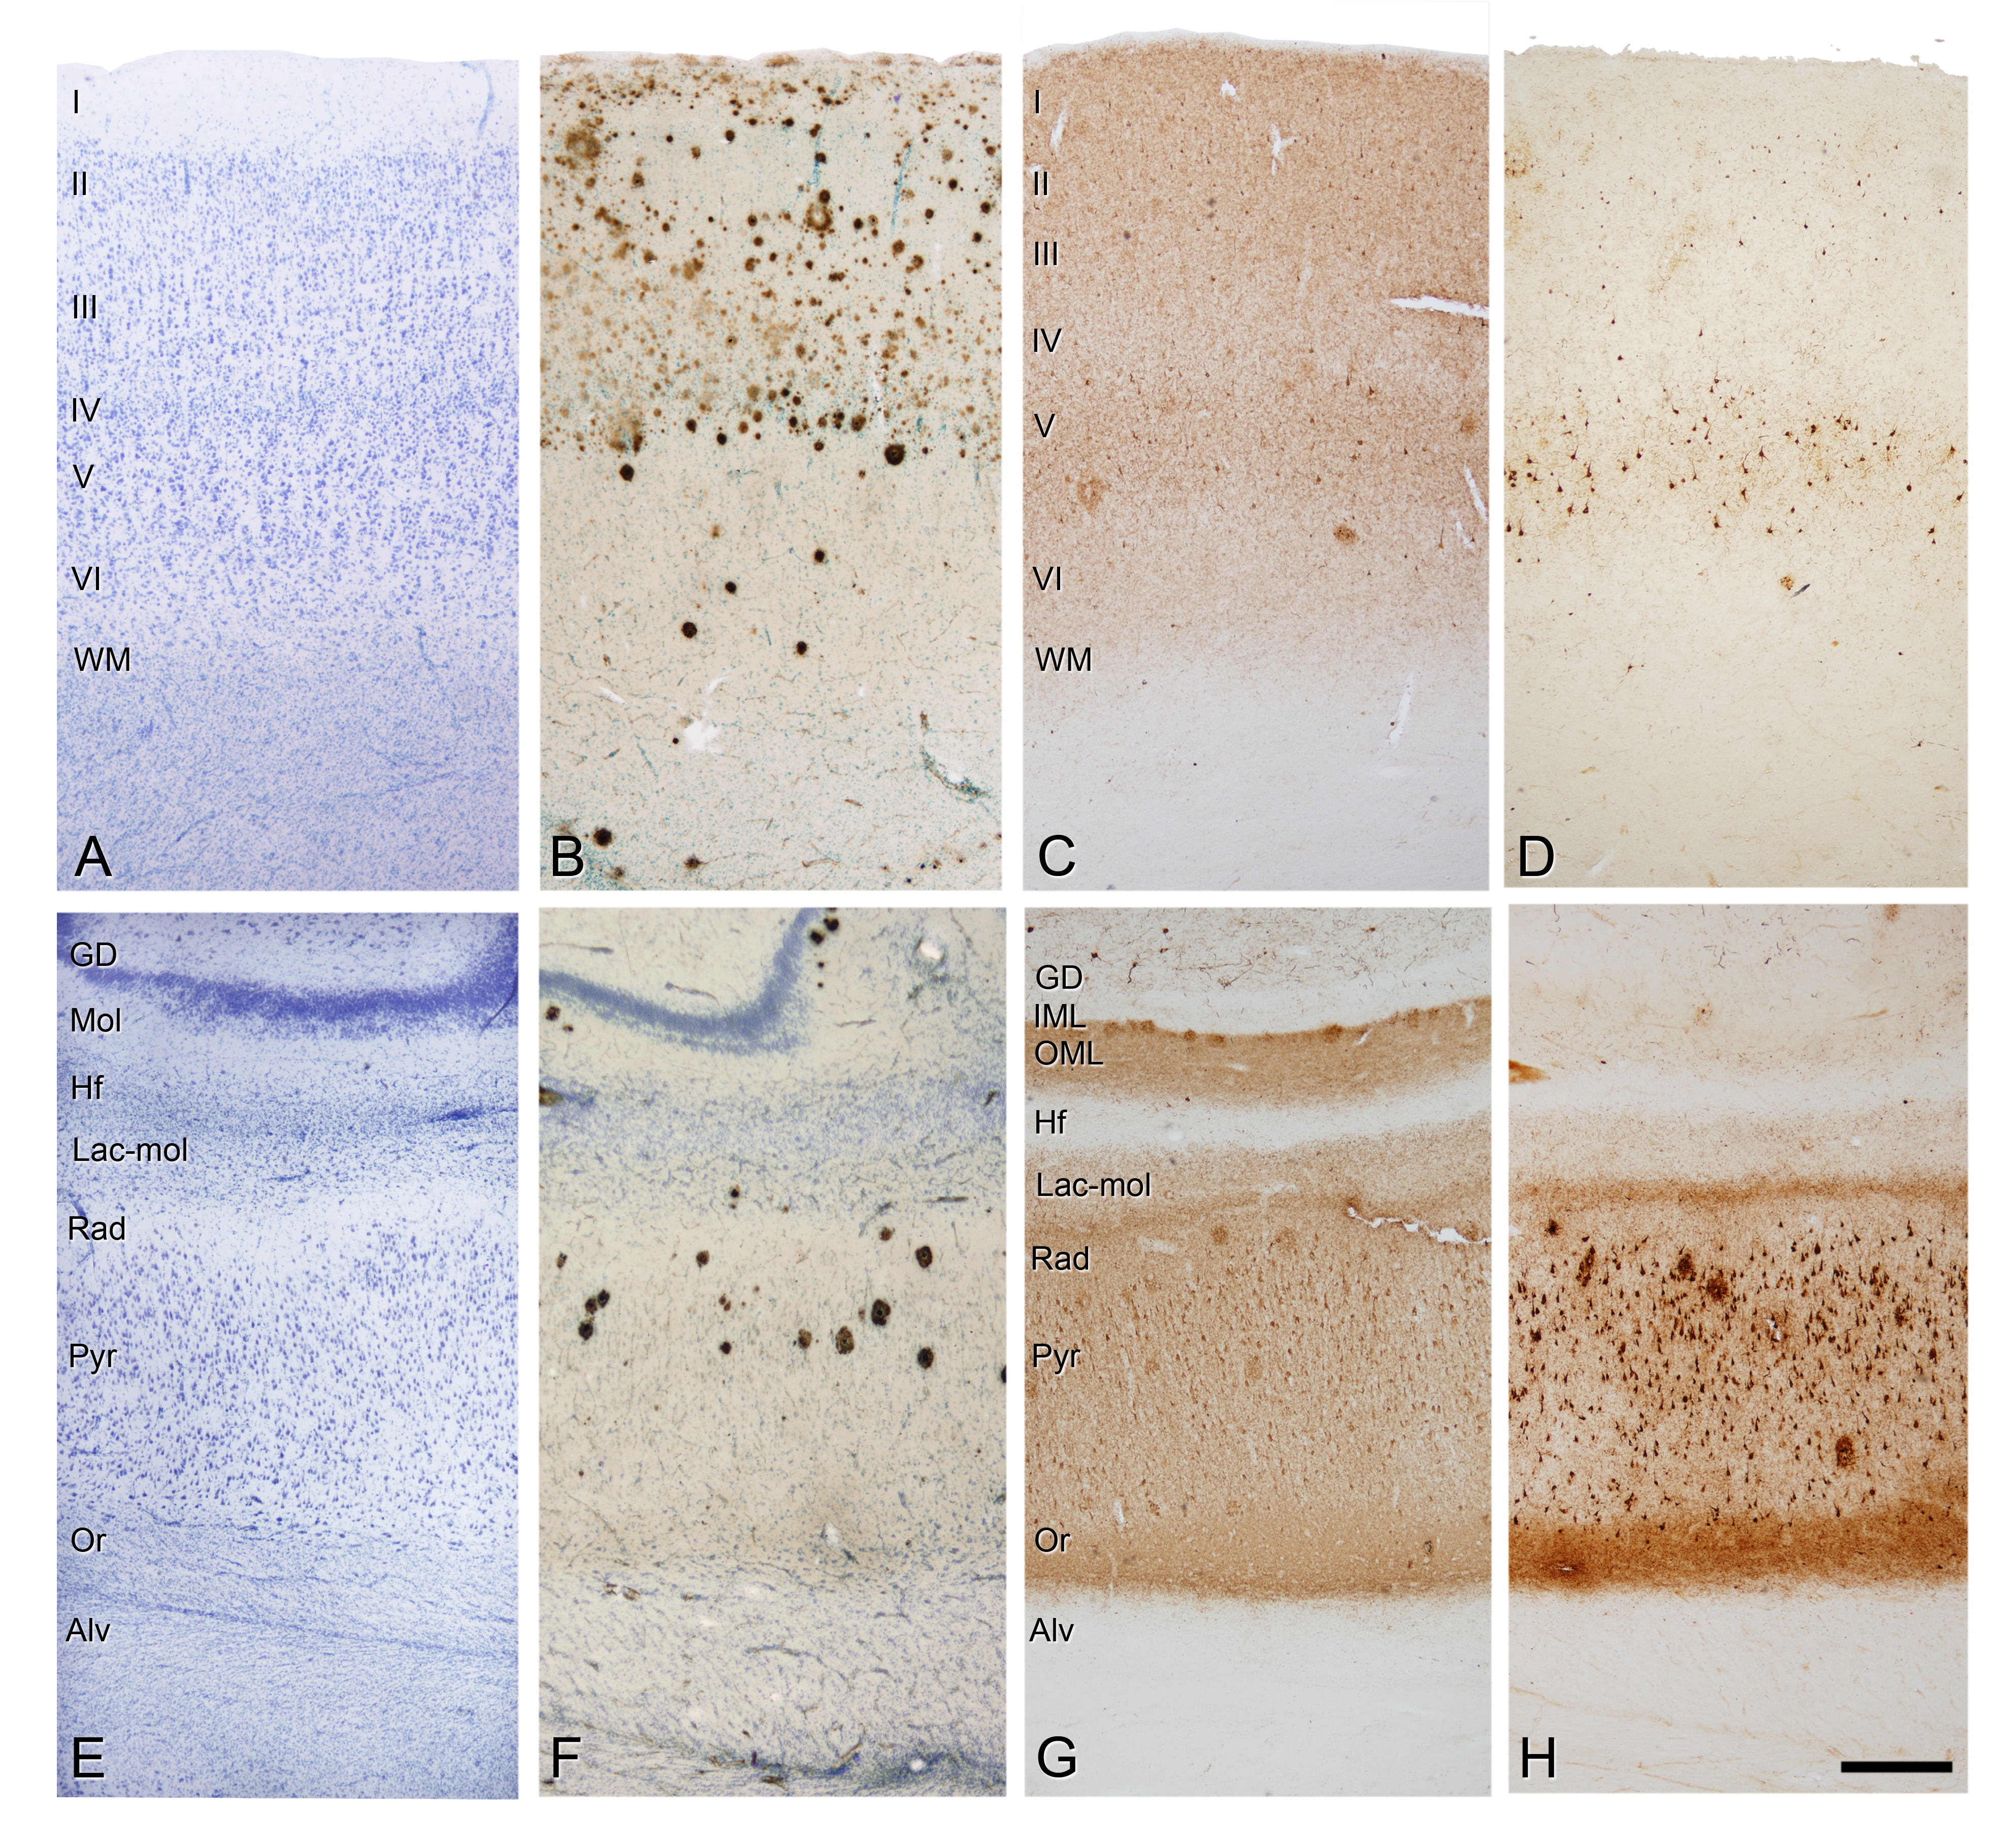

Supplement: awt088_Supplementary_Data.zip [file awt088_Supplementary_Data.zip › brain-2012-01458-File014.jpg]

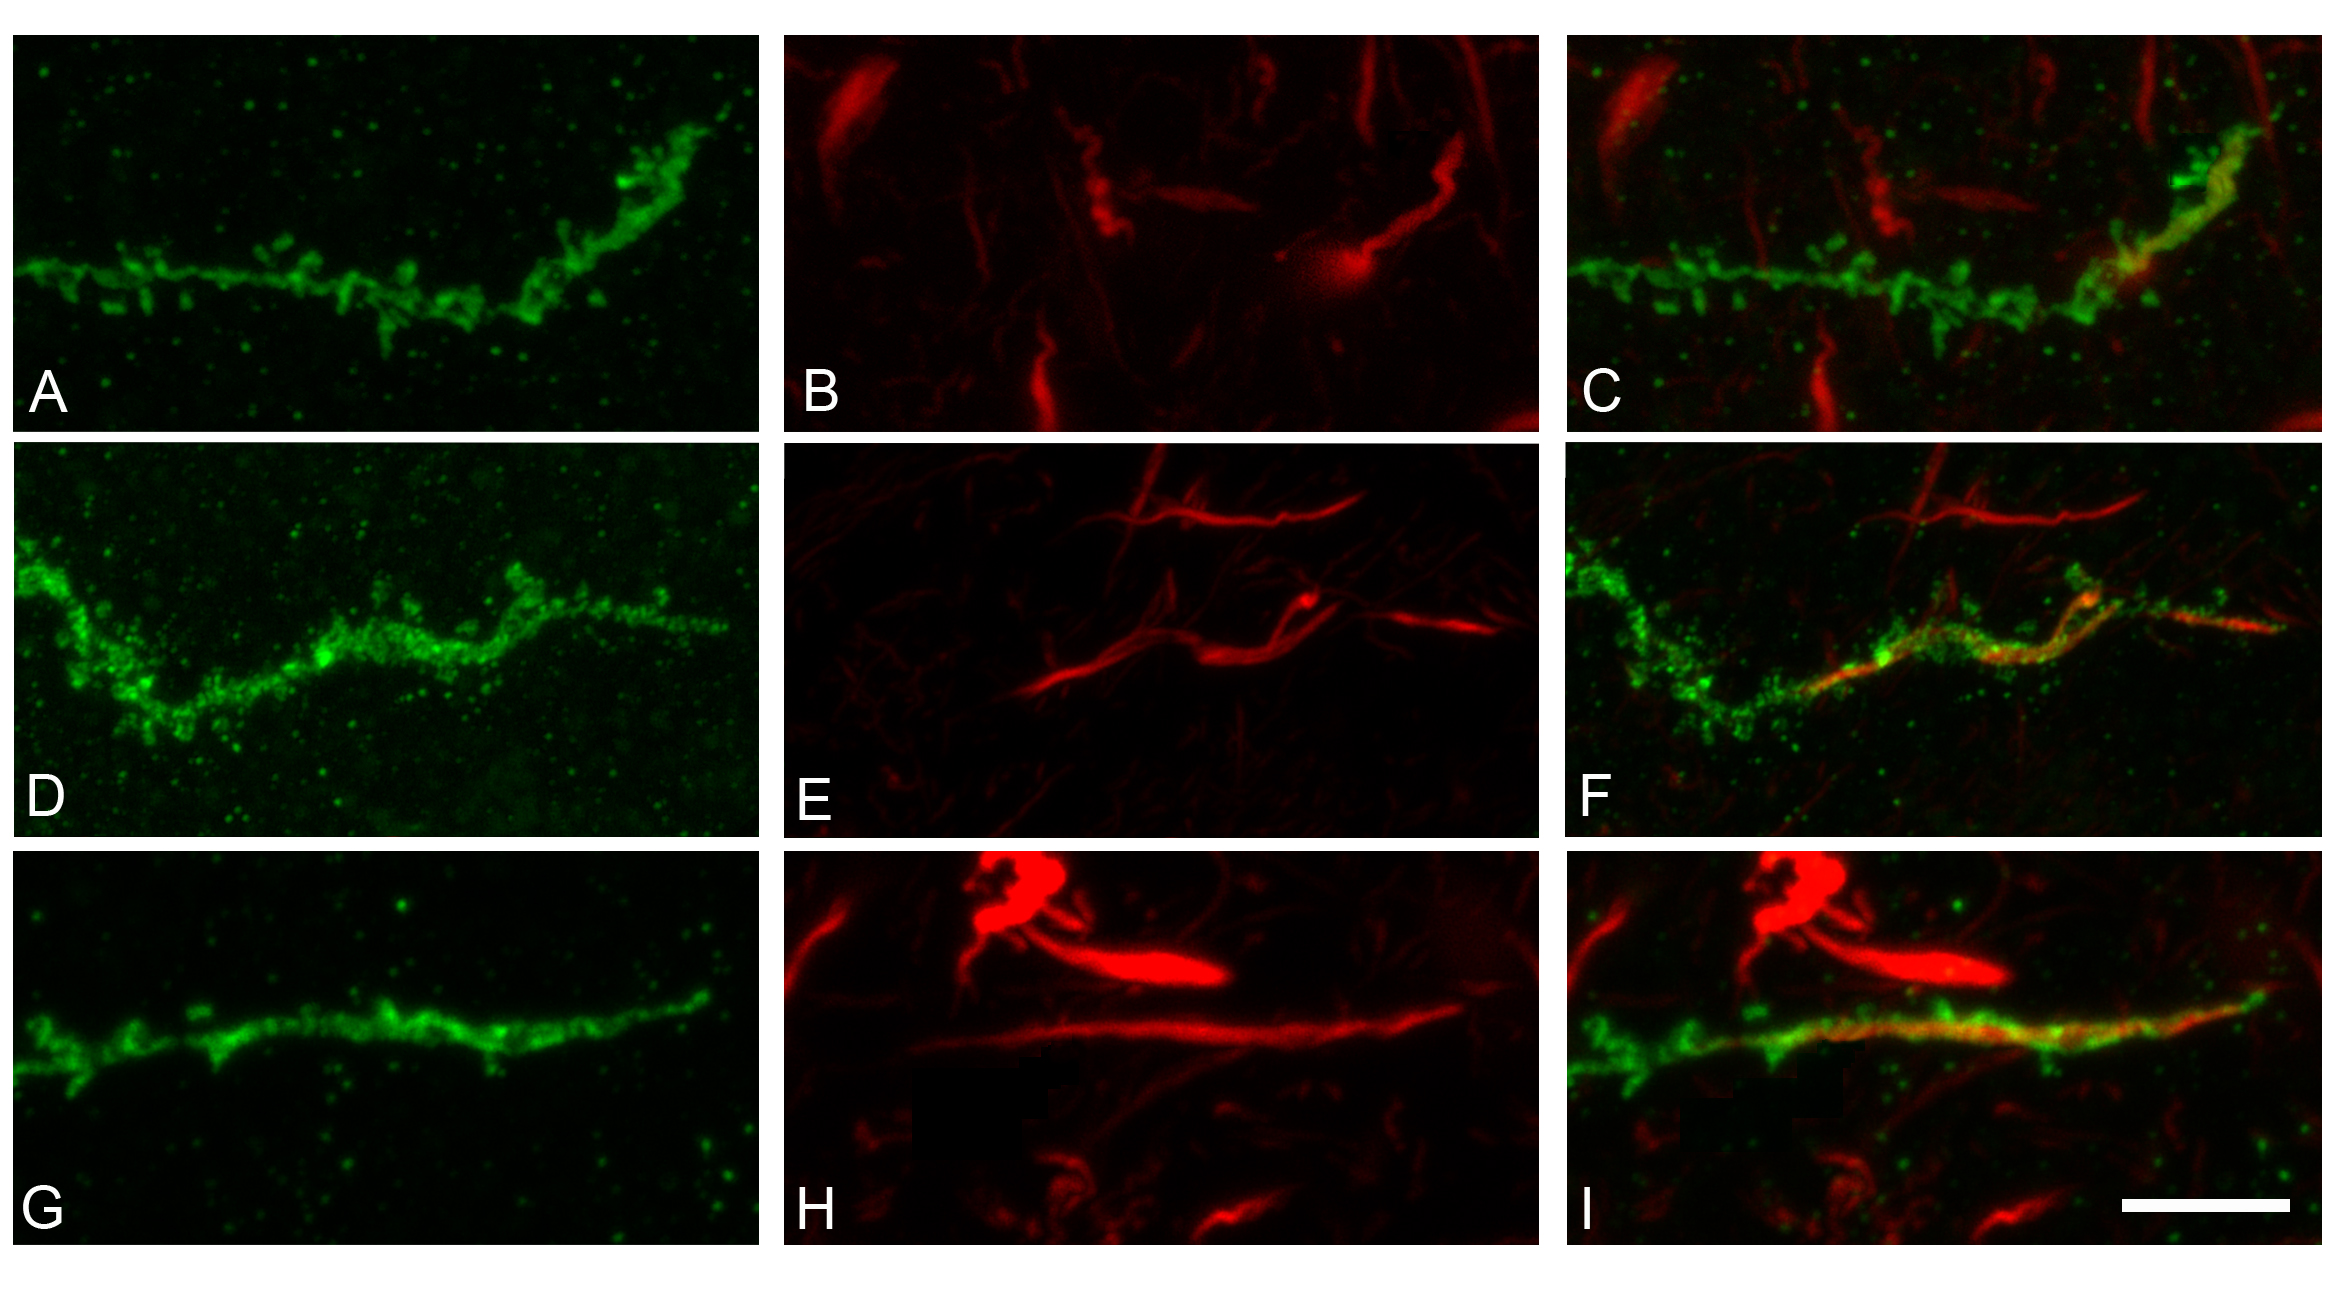

Supplement: awt088_Supplementary_Data.zip [file awt088_Supplementary_Data.zip › brain-2012-01458-File021.jpg]

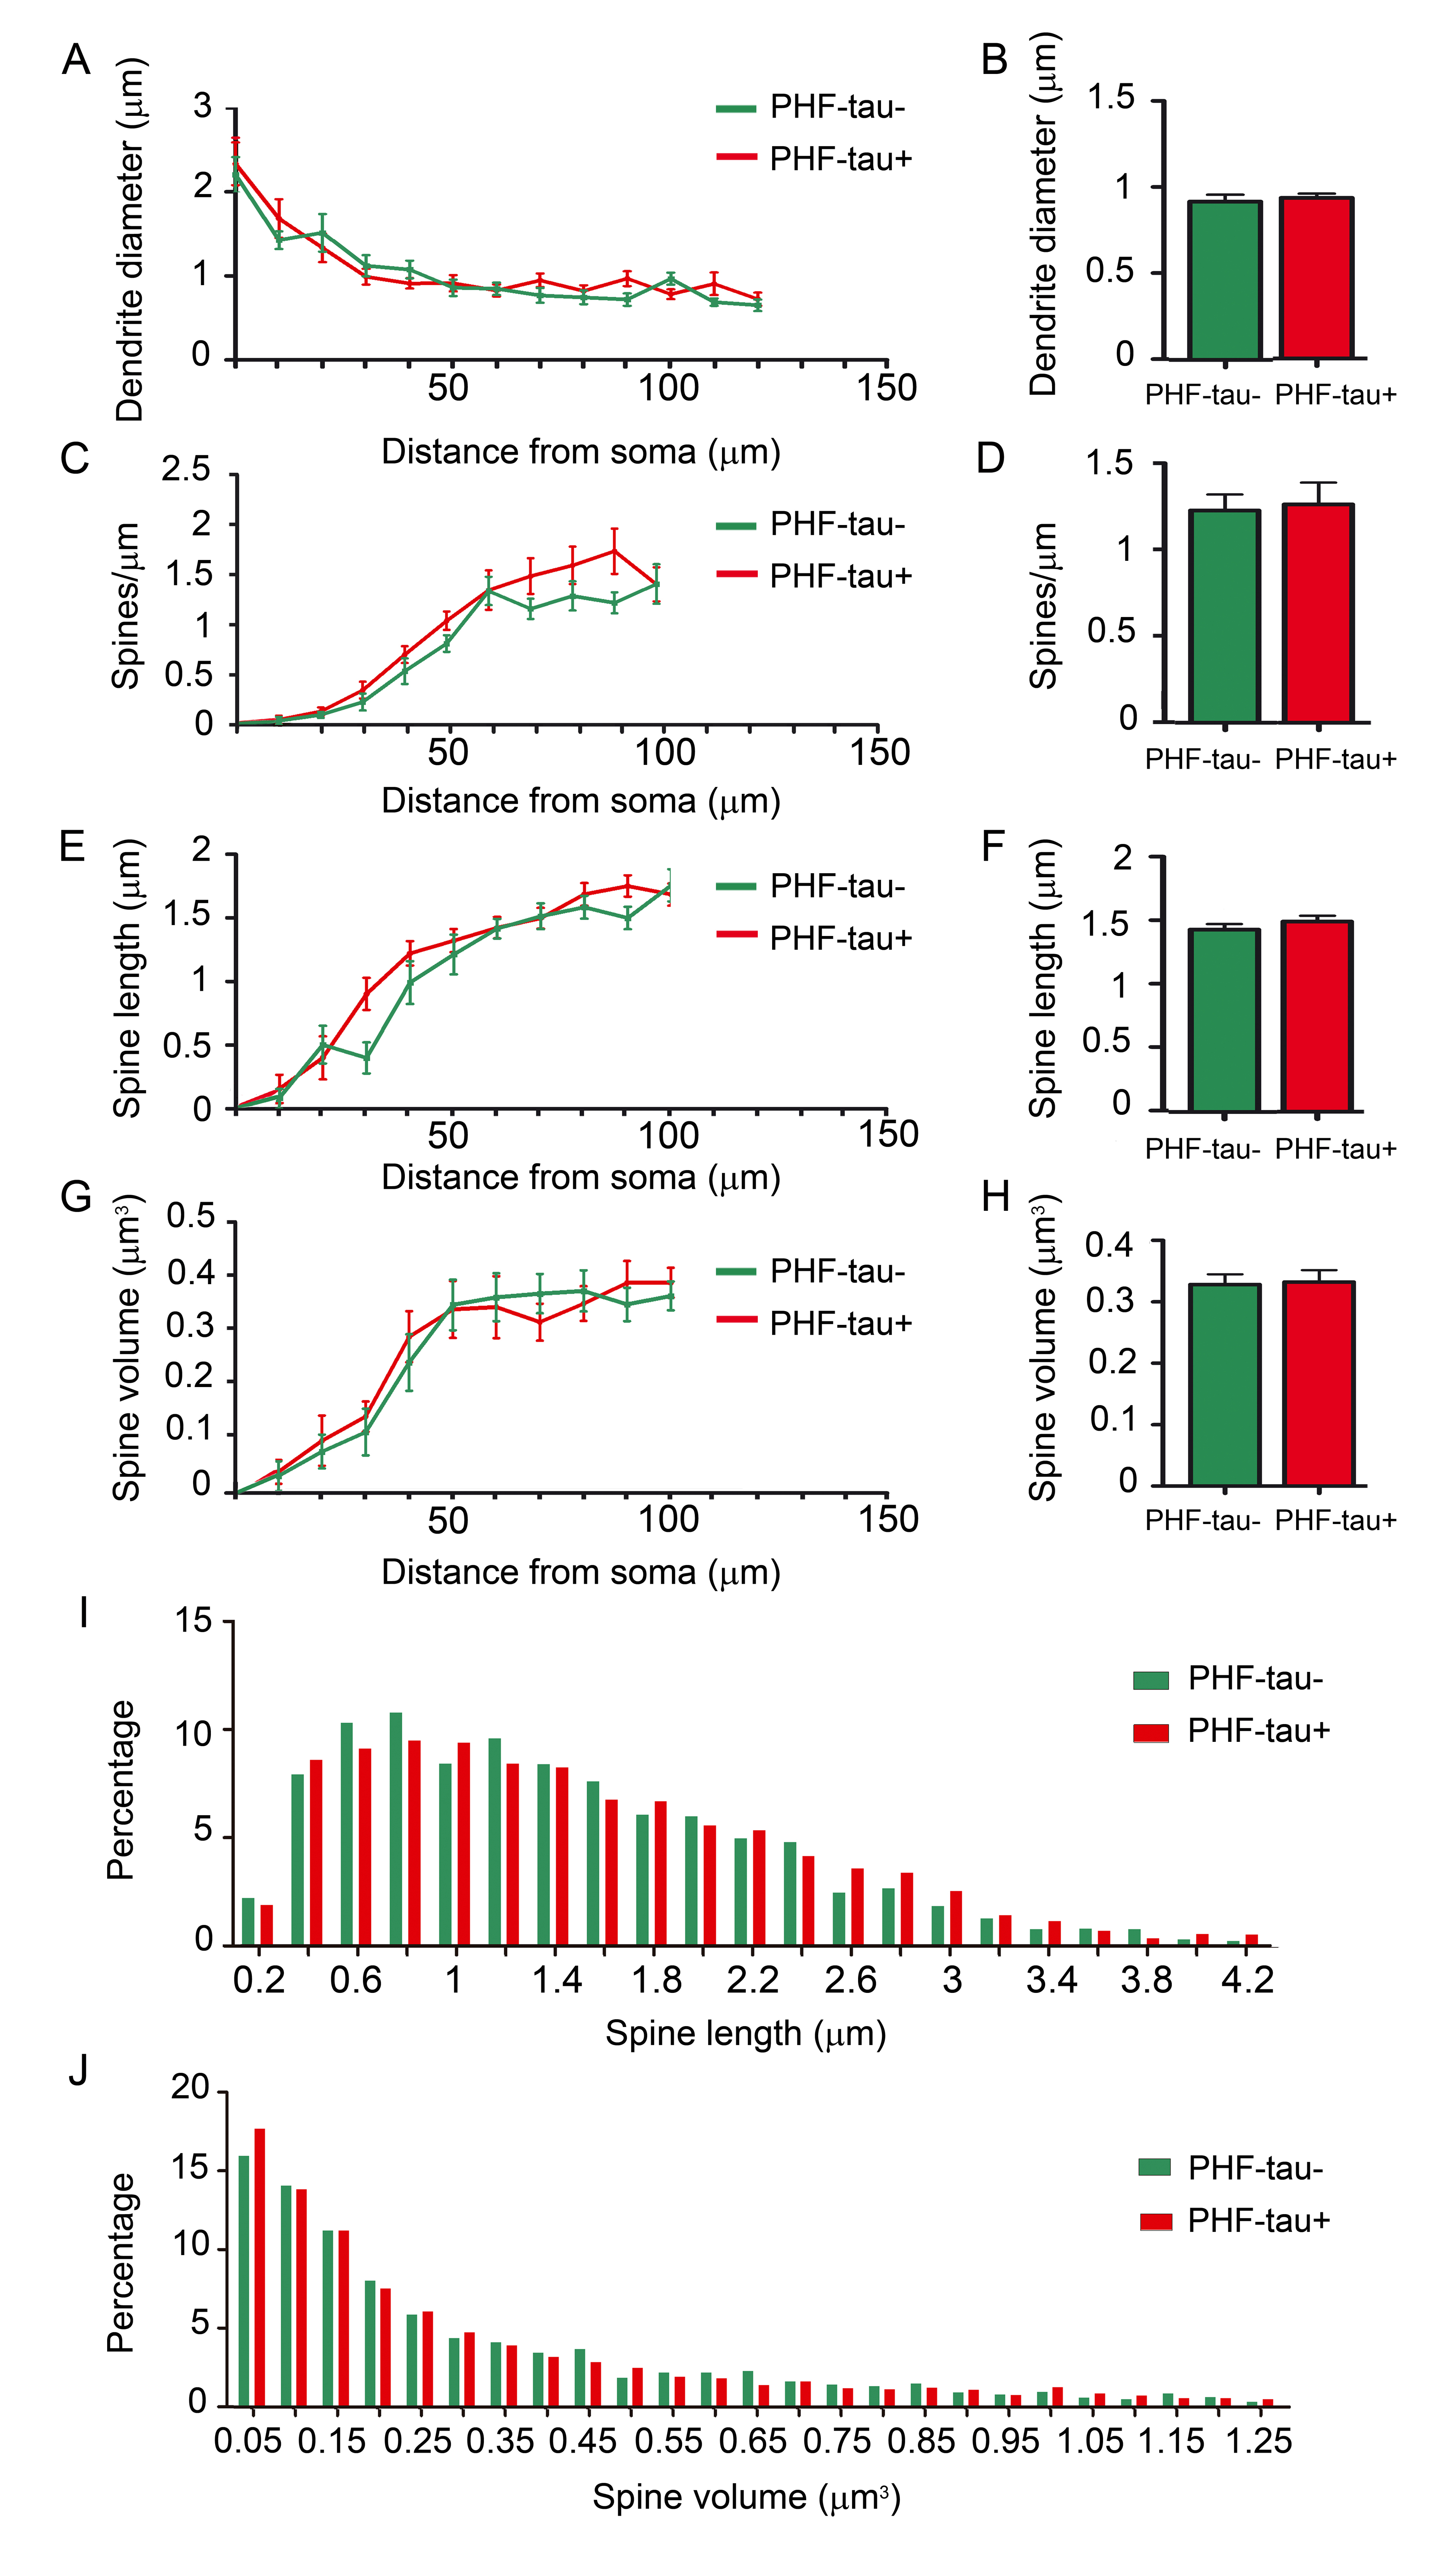

Supplement: awt088_Supplementary_Data.zip [file awt088_Supplementary_Data.zip › brain-2012-01458-File019.jpg]

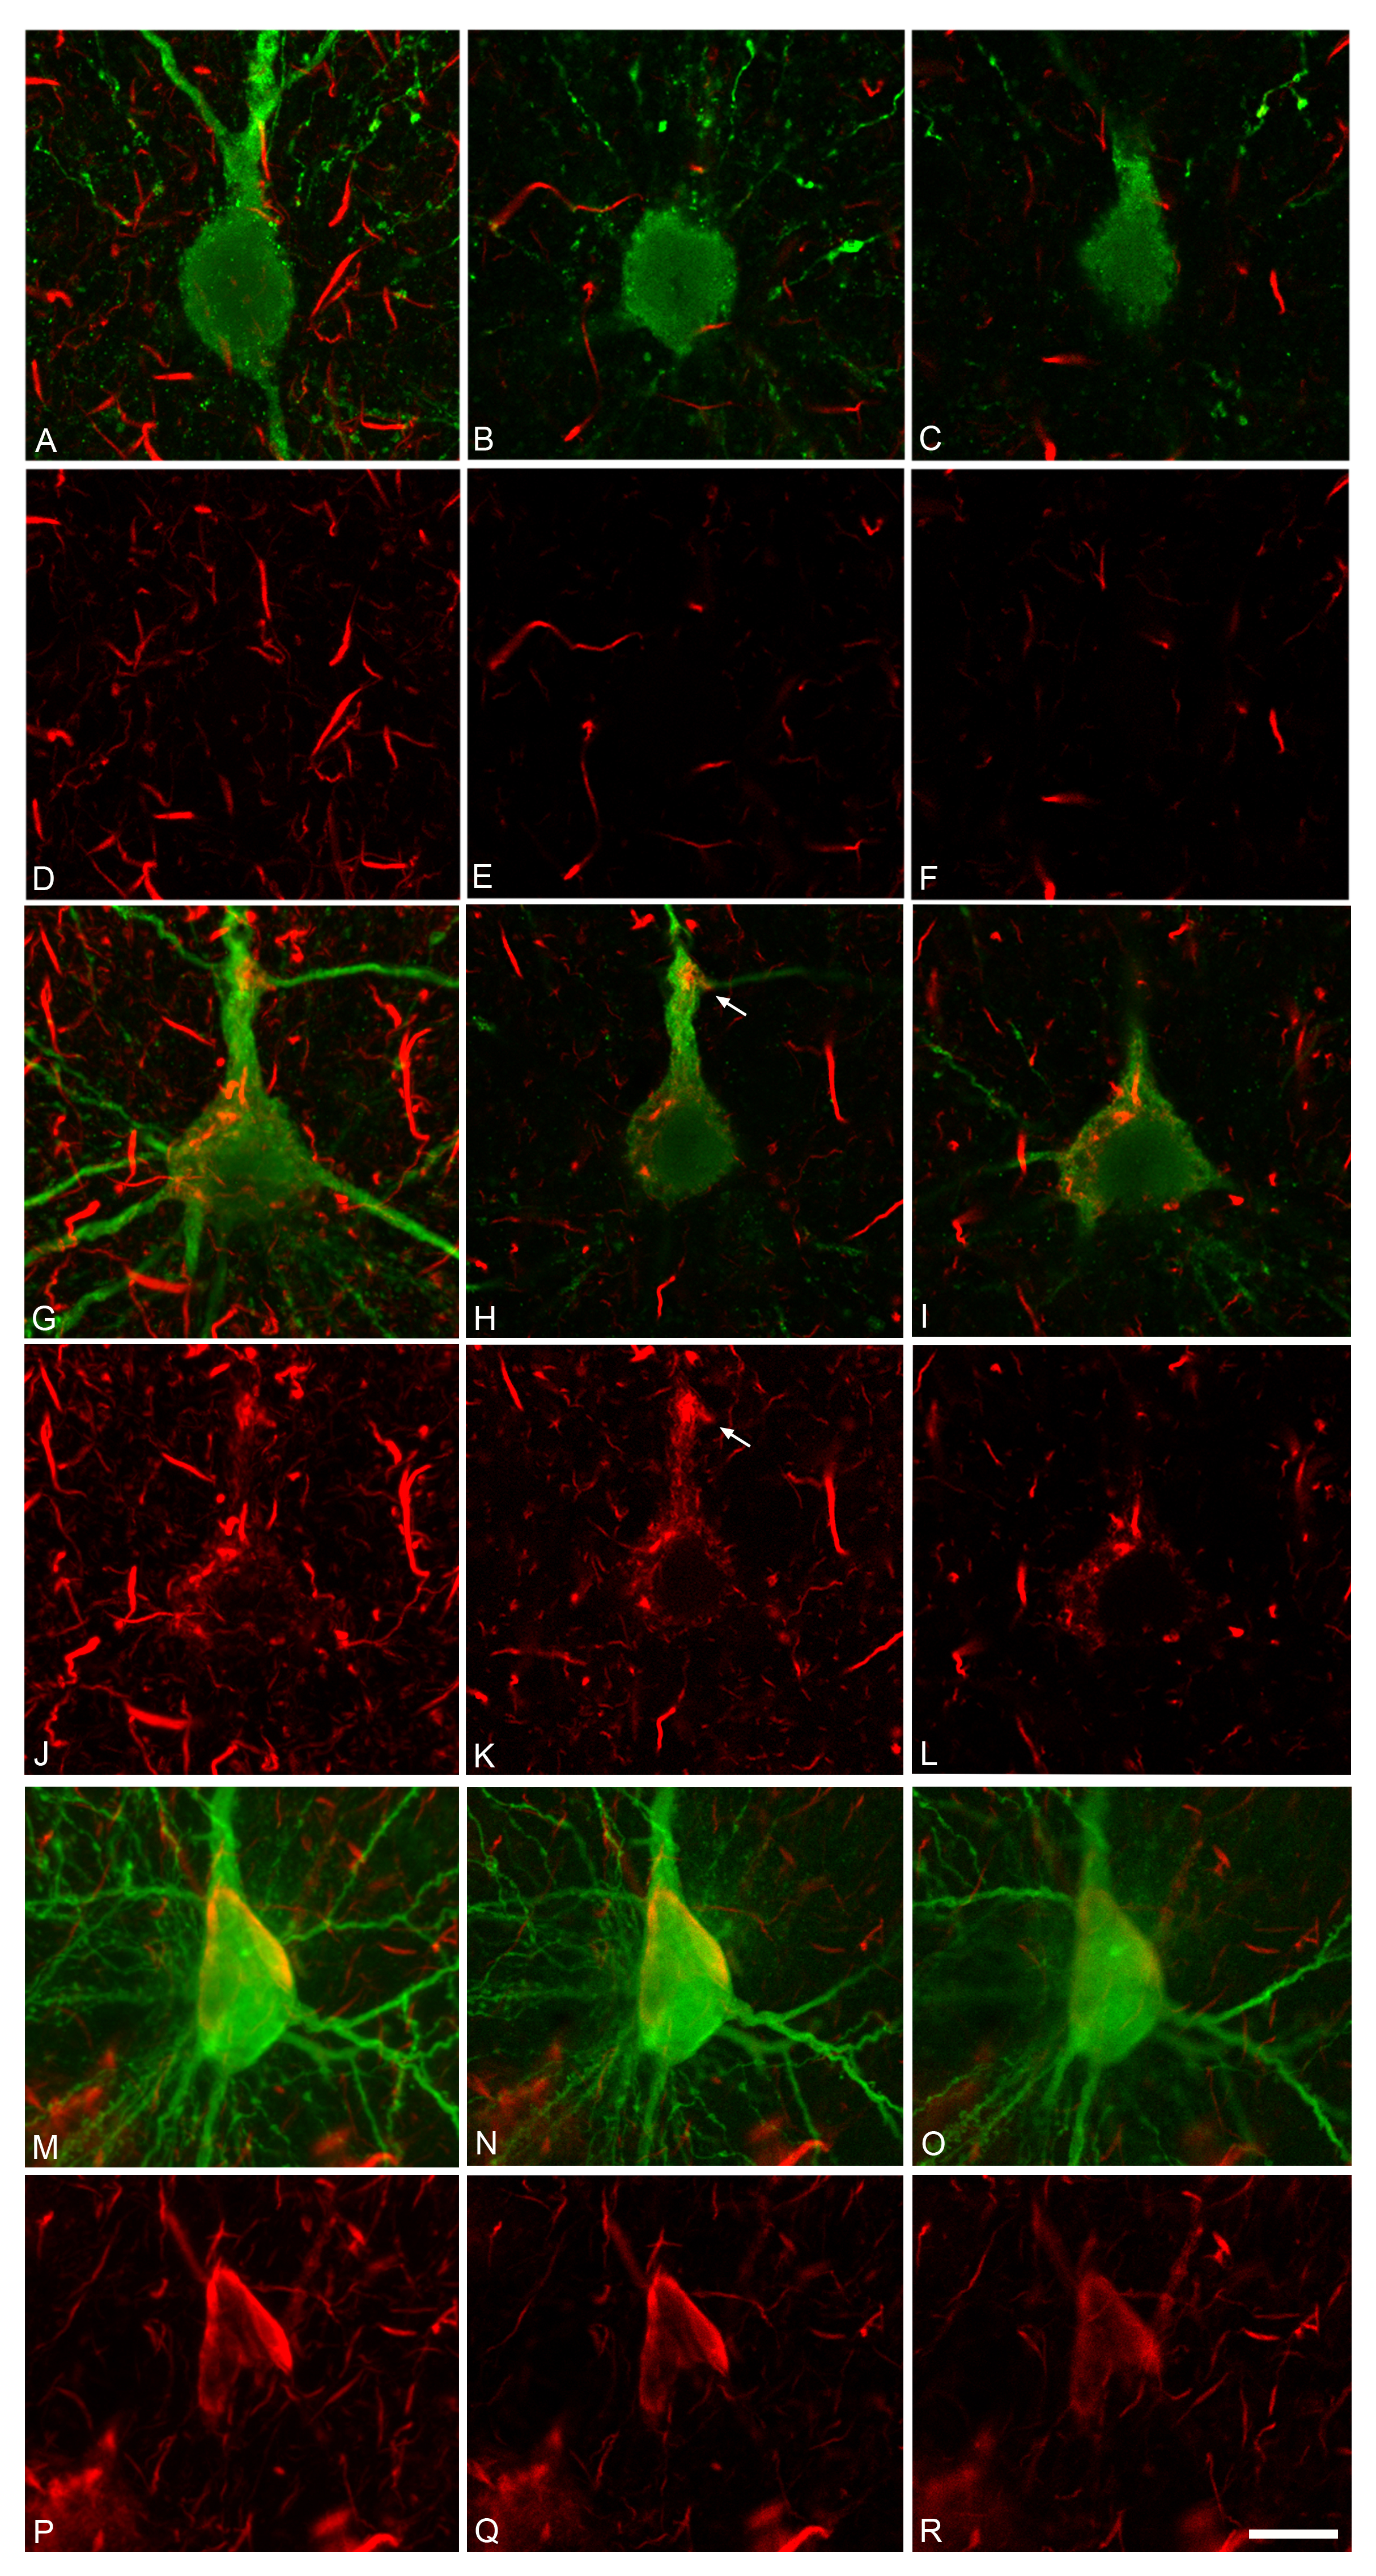

Supplement: awt088_Supplementary_Data.zip [file awt088_Supplementary_Data.zip › brain-2012-01458-File016.jpg]

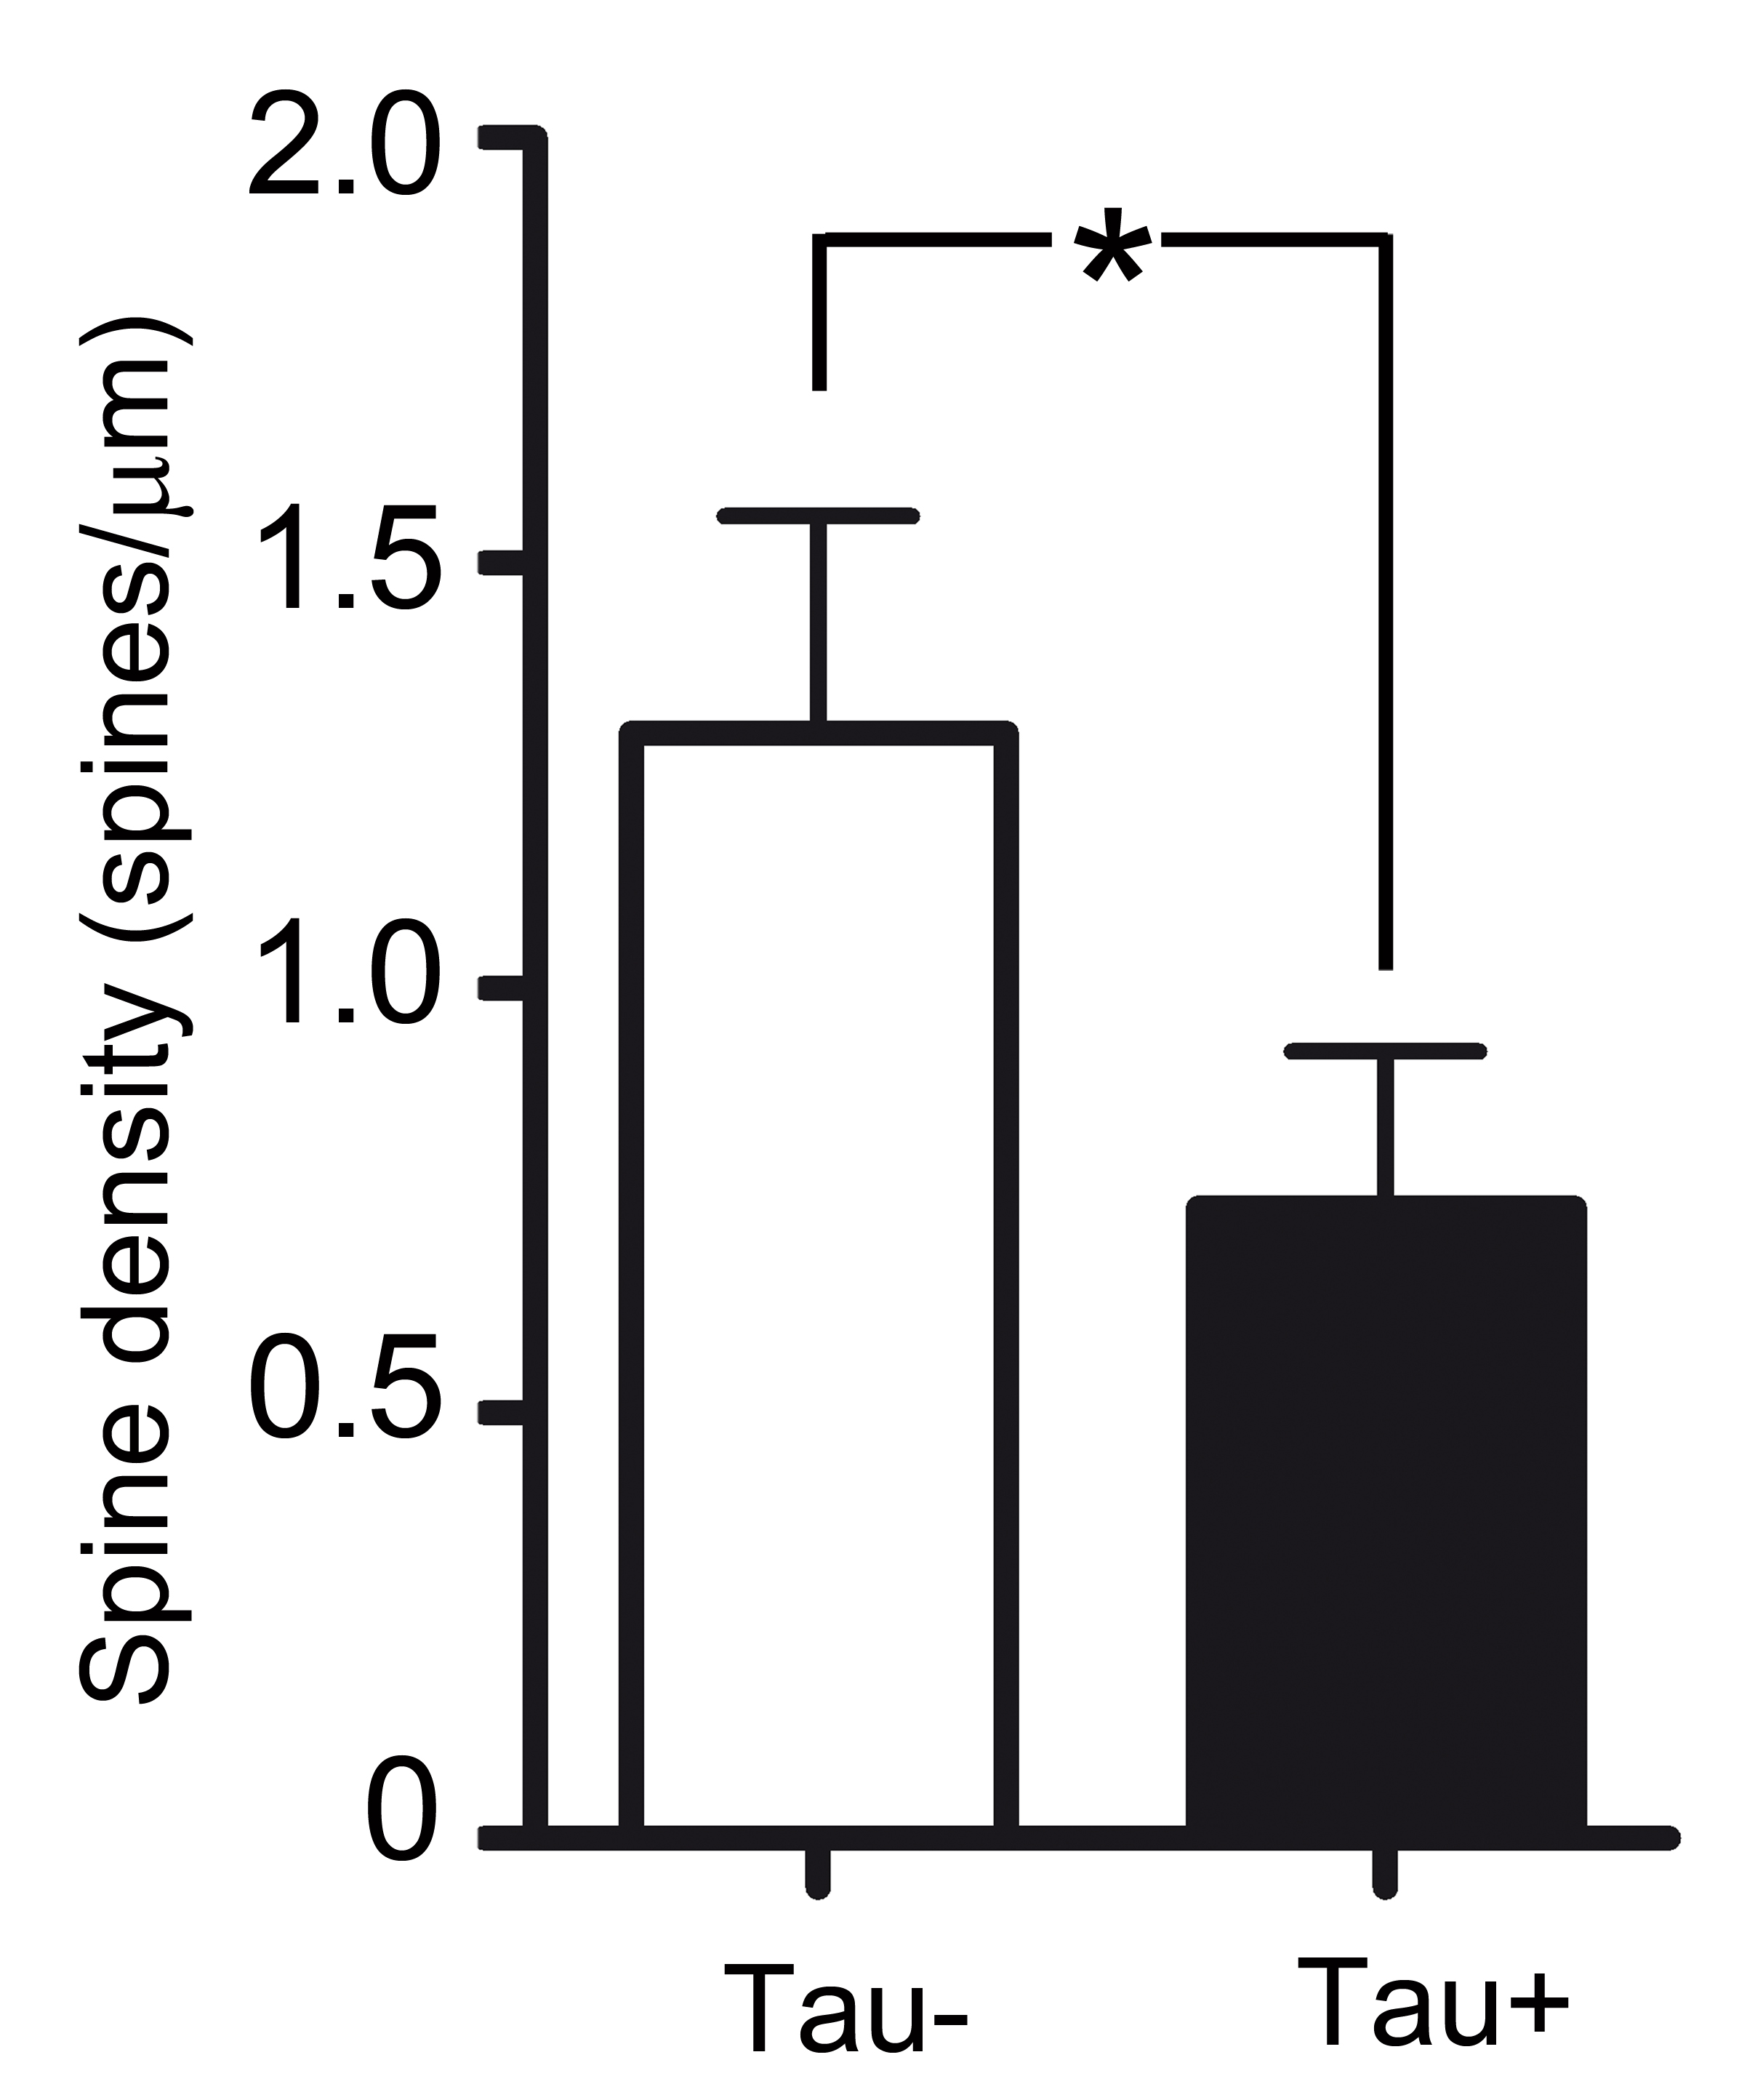

Supplement: awt088_Supplementary_Data.zip [file awt088_Supplementary_Data.zip › brain-2012-01458-File022.jpg]

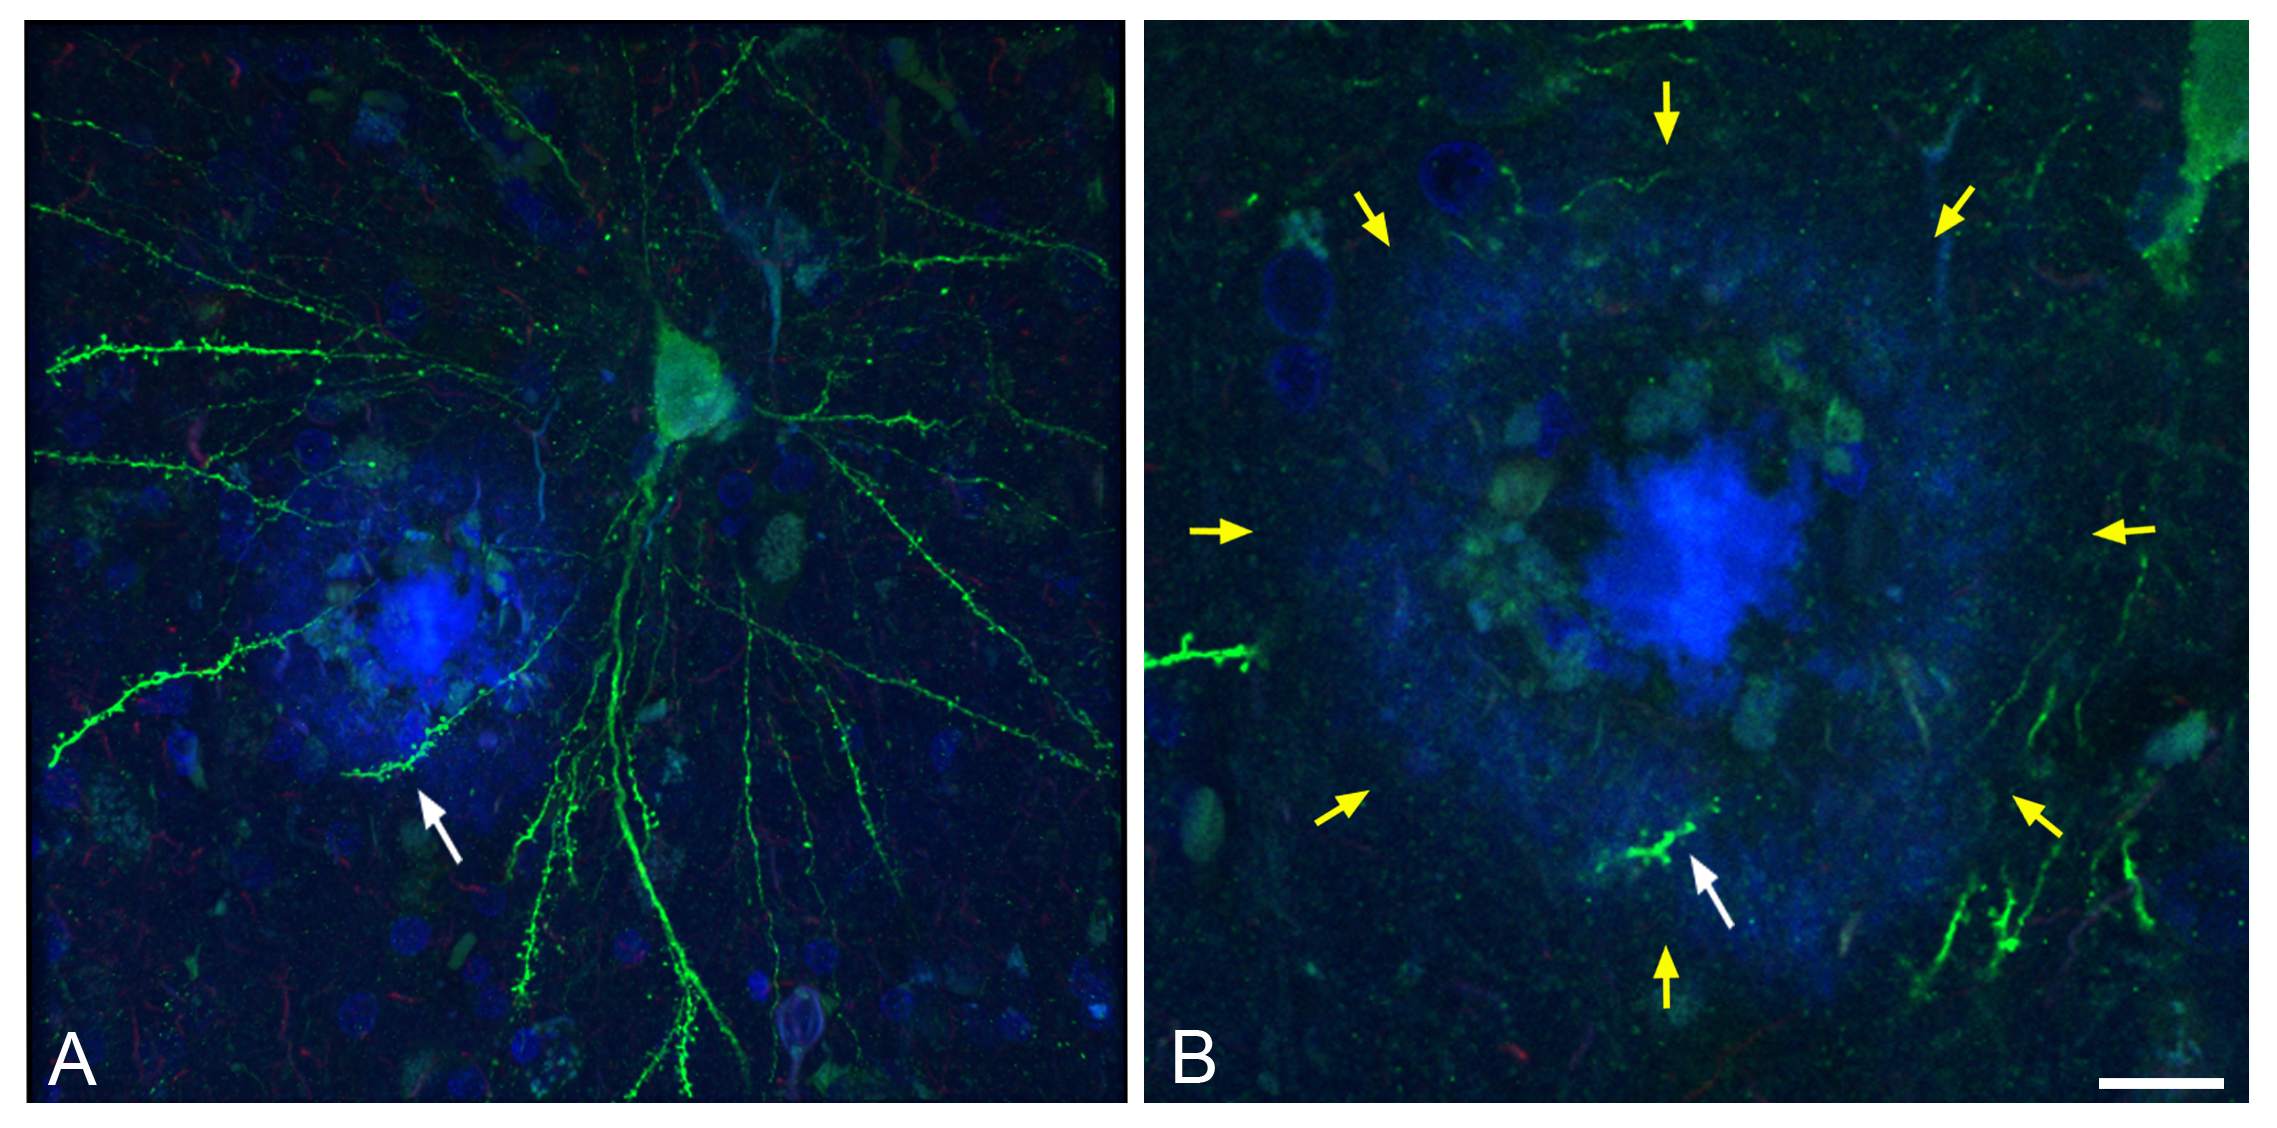

Supplement: awt088_Supplementary_Data.zip [file awt088_Supplementary_Data.zip › brain-2012-01458-File017.jpg]

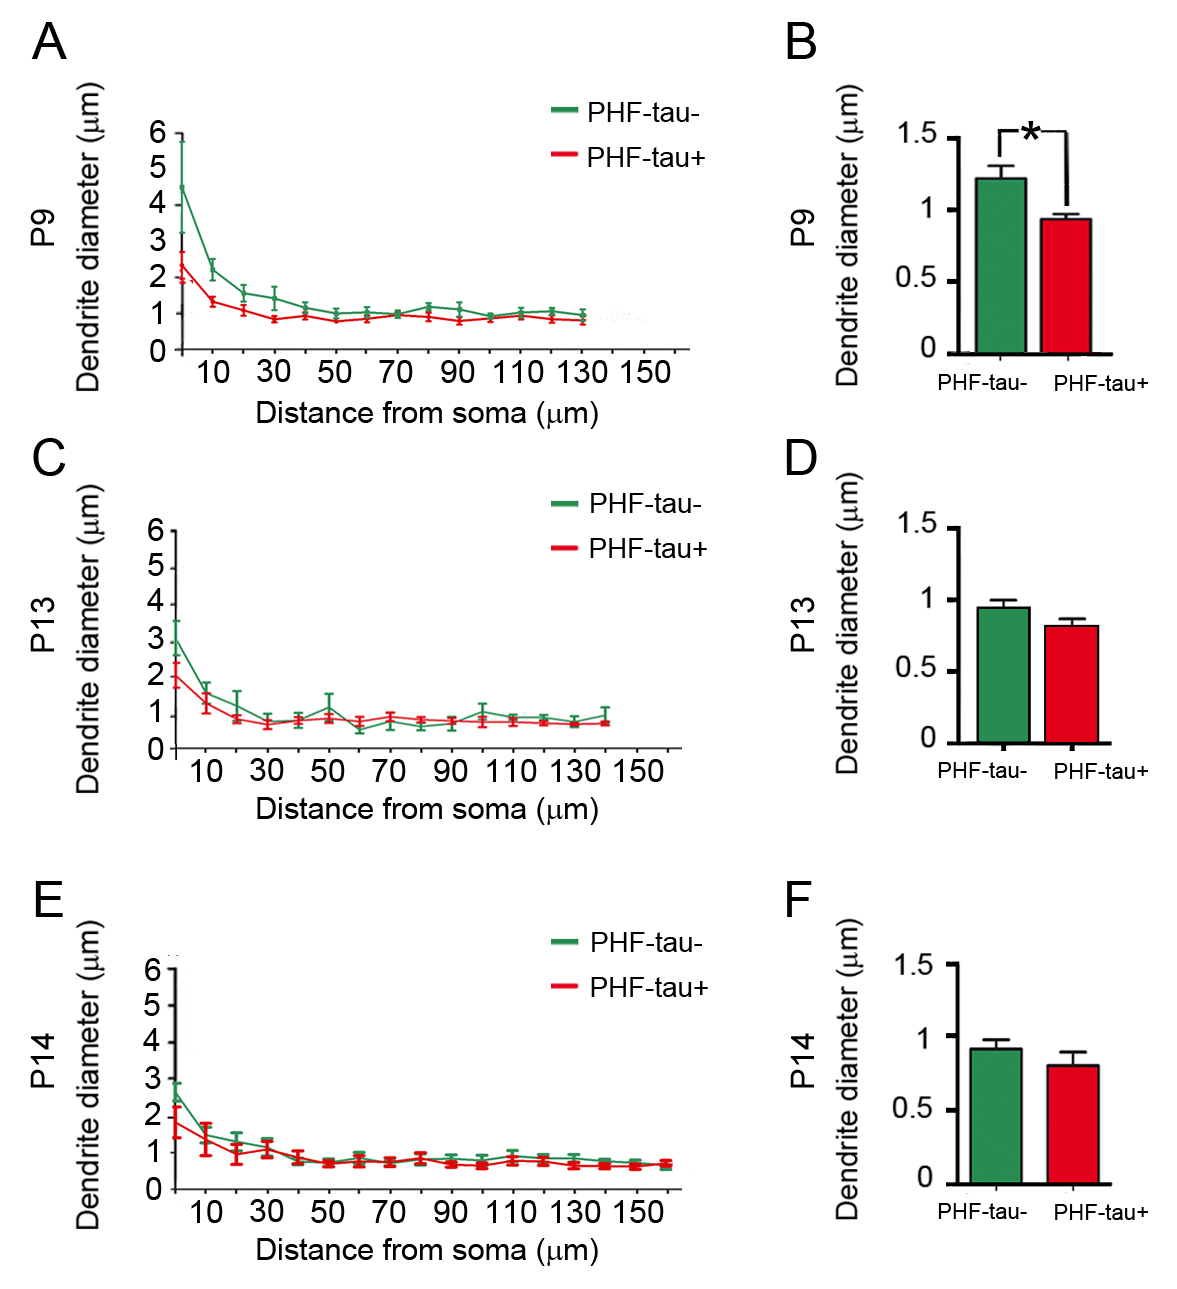

Supplement: awt088_Supplementary_Data.zip [file awt088_Supplementary_Data.zip › brain-2012-01458-File020.jpg]

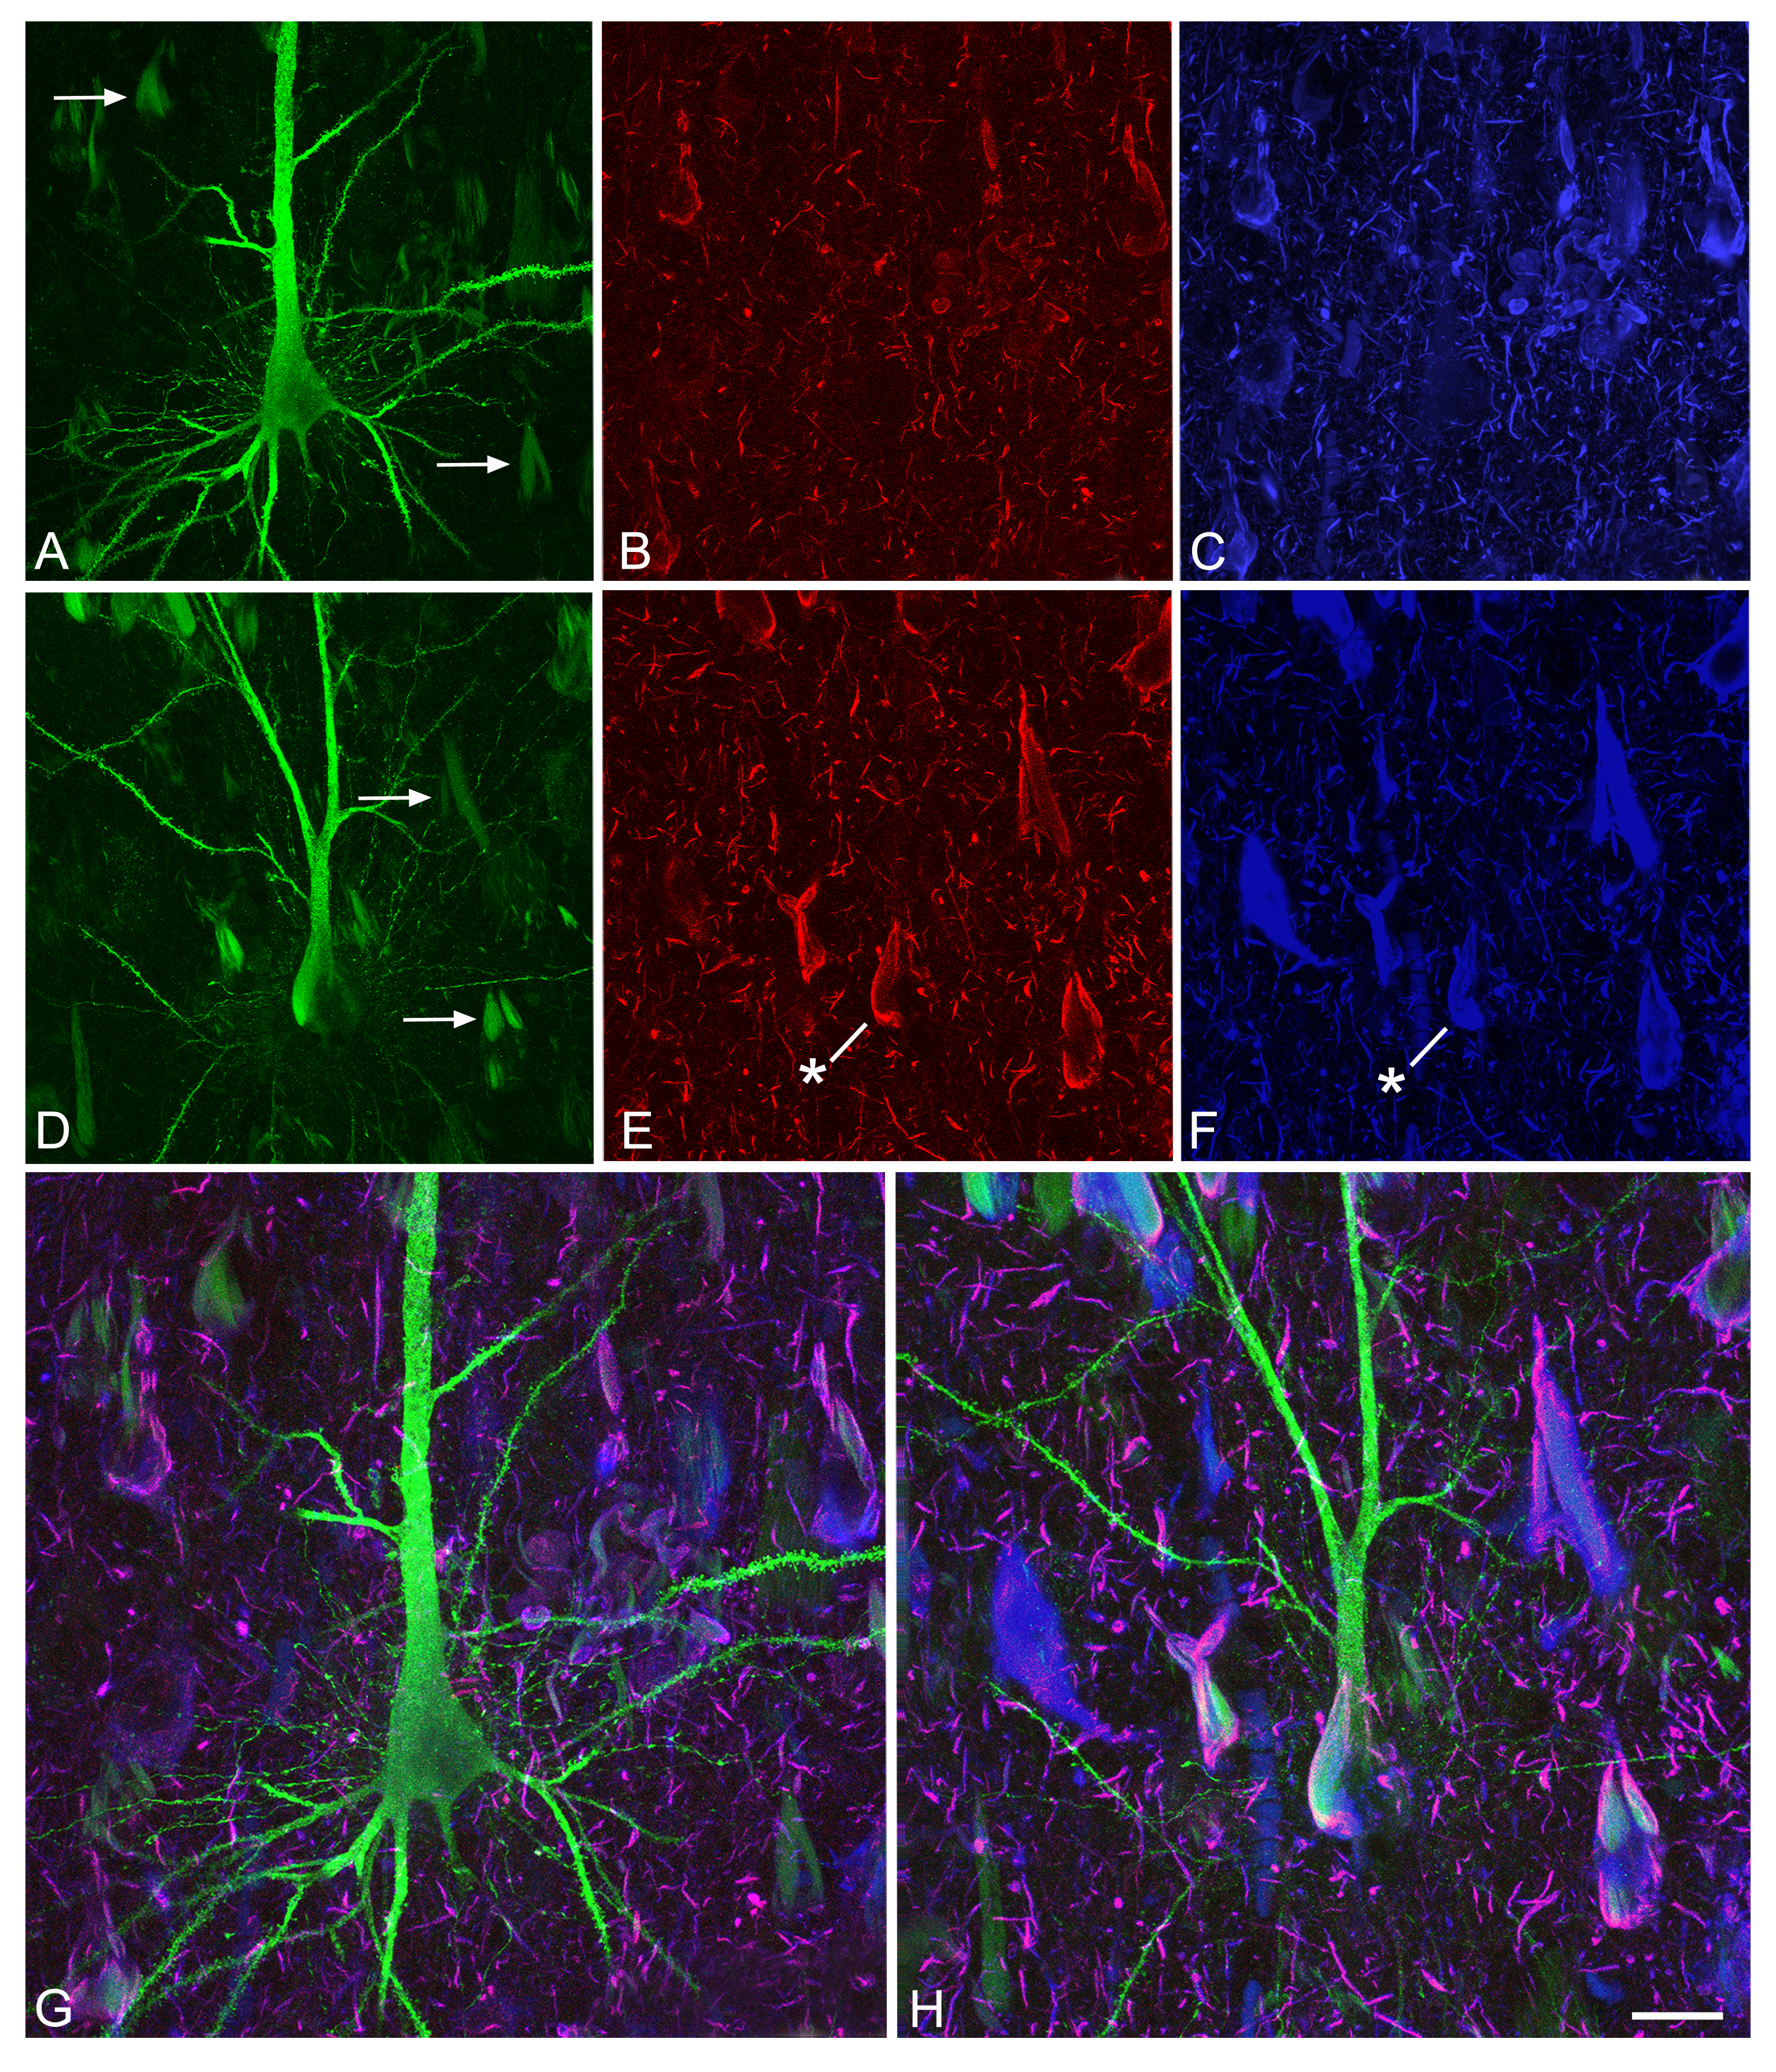

Supplement: awt088_Supplementary_Data.zip [file awt088_Supplementary_Data.zip › brain-2012-01458-File018.jpg]
